# Supplementary material for: Molecular insights into the powerful mucus-based adhesion of limpets (Patella vulgata L.)
Source: PubMed Central journal article supplement (PMC7333891; doi:10.1098/rsob.200019), 2020-06-17
Supplement: rsob200019supp1.pdf [file rsob200019supp1.pdf]

# Molecular insights into the powerful mucus-based adhesion of limpets (*Patella vulgata* L.)

Victor Kang<sup>1\*</sup>, Birgit Lengerer<sup>2,3</sup>, Ruddy Wattiez<sup>4</sup>, Patrick Flammang<sup>2</sup>

<https://dx.doi.org/10.1098/rsob.20.0019>

<sup>1</sup>Department of Zoology, University of Cambridge, Cambridge, UK

<sup>2</sup>Biology of Marine Organisms and Biomimetics Unit, Research Institute for Biosciences, University of Mons, Mons 7000, Belgium

<sup>3</sup>Institute of Zoology, University of Innsbruck, 6020 Innsbruck, Austria

<sup>4</sup>Laboratory of Proteomics and Microbiology, Research Institute for Biosciences, University of Mons, Mons 7000, Belgium

\*Correspondence: [kwk22@cam.ac.uk](mailto:kwk22@cam.ac.uk)

## Supplementary Materials

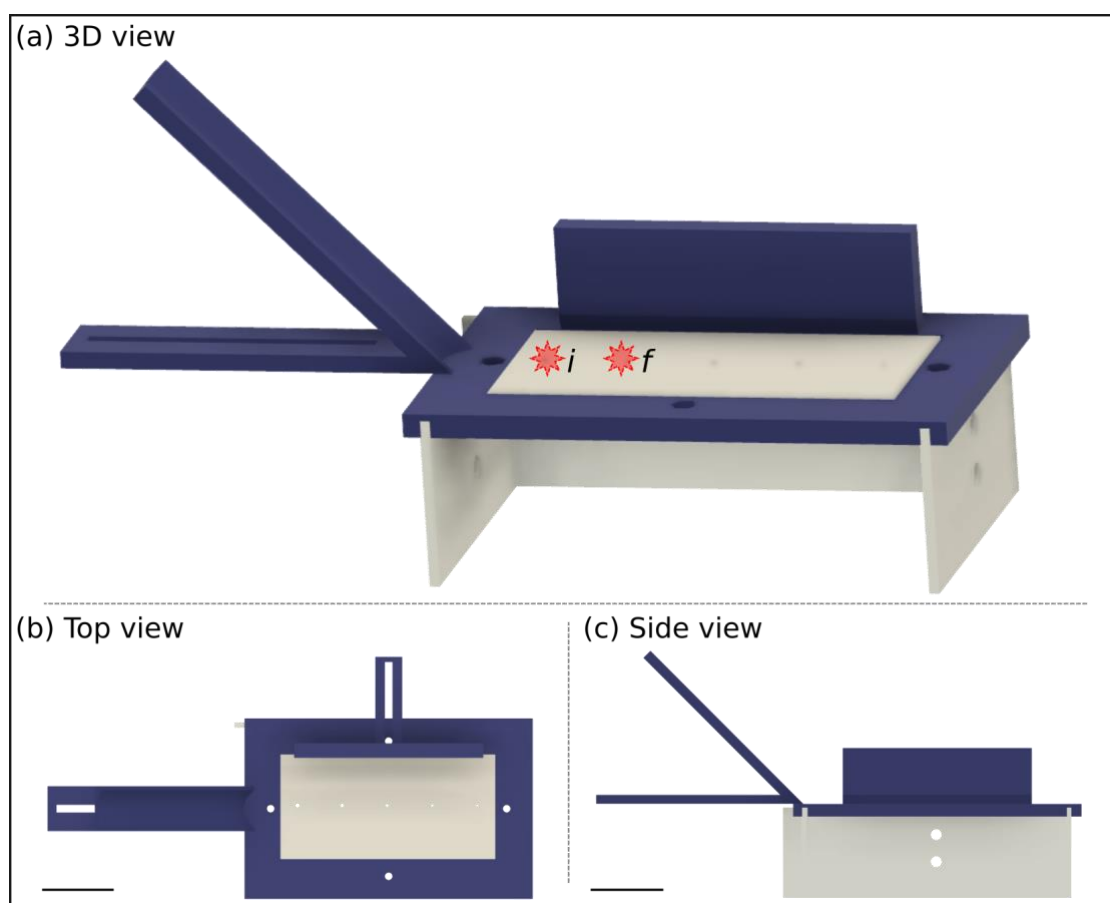

**Supplementary Figure 1:** Schematic of the *in vivo* pressure sensor rig made using 3D printed PLA components and laser-cut acrylic sheets. (a) 3D view, showing the 45° ramp used to accelerate the ball bearing. Red stars indicate initial *i* and final *f* position of limpets during free locomotion trials. (b) & (c) Top and side view of the set-up, respectively. Scale bar 40 mm.

### Additional information on sequence quality check, trimming, and assembly

#### Quality check and trimming

Raw reads were filtered to remove reads with adaptors, reads with >5% unknown bases, and low quality reads (defined by BGI as reads in which the proportion of bases with a quality score < 10 was greater than 20%).

### Assembly settings

The full software setting for read alignment using bowtie2, v2.2.5 was as follows: *Parameters: -q --phred64 --sensitive --dpad 0 --gbar 99999999 --mp 1,1 --np 1 --score-min L,0,-0.1 -l 1 -X 1000 --no-mixed --no-discordant -p 1 -k 200.*

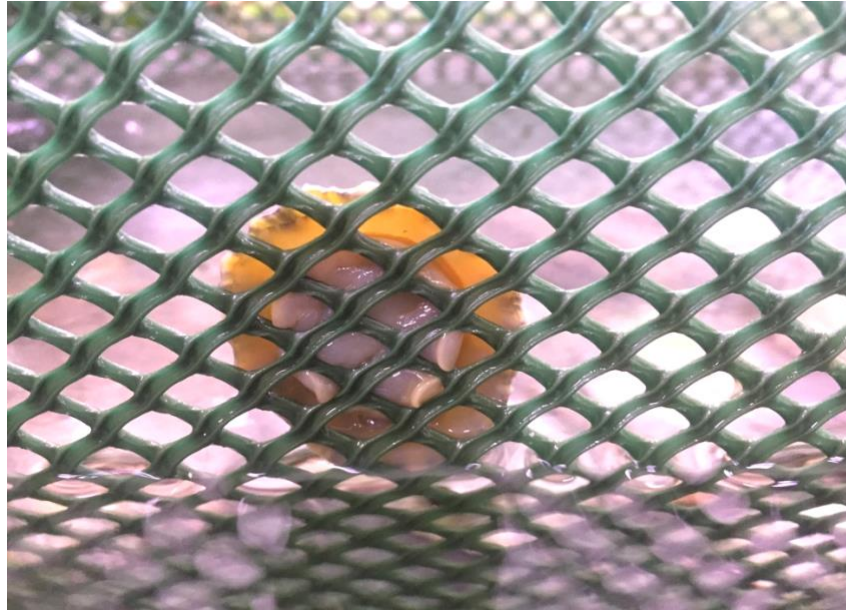

**Supplementary Figure 2:** Example of a limpet that managed to crawl up and adhere to plastic mesh.

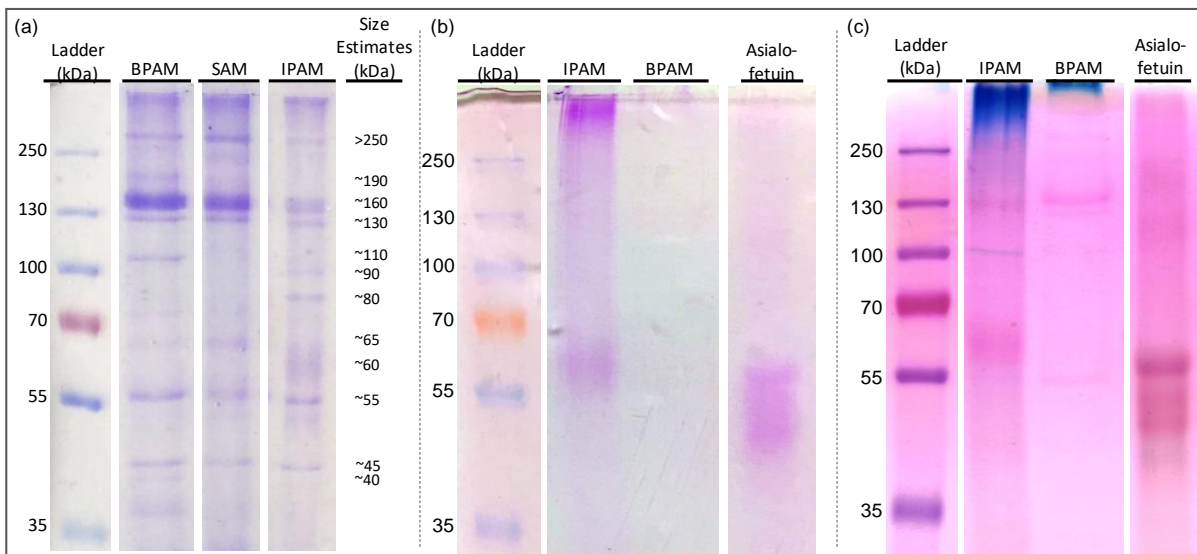

**Supplementary Figure 3:** SDS-PAGE gels of protein extracts from *P. vulgata* pedal sole mucus stained for additional information. BPAM: bulk primary adhesive mucus; SAM: secondary adhesive mucus; IPAM: interfacial primary adhesive mucus. (a) Coomassie Blue stain identified at least 11 prominent protein bands, ranging from ~40 to greater than 250 kDa. Note the approximate protein band sizes to the right of the gel image. (b) Smearing purple bands from PAS staining confirms that the presence of glycosylation for specific proteins within IPAM and not in BPAM. The strong smearing at the top of the gel indicates large complexes that failed to properly migrate into the gel. Asialo-fetuin from bovine serum used to as a reference glycoprotein to illustrate smearing pattern. (c) Multi-coloured bands from Stains-All highlight several differences between BPAM and IPAM (blue for highly acidic proteins and  $\text{Ca}^{2+}$ -binding proteins, purple for intact proteoglycans, and pink for weakly acidic proteins).

**Supplementary Table 1:** Transcriptome sequencing and assembly results of mRNA isolated from limpet pedal sole.

| <b>Sequencing output</b>       |            |
|--------------------------------|------------|
| Total raw reads (M)            | 256.35     |
| Total clean reads (M)          | 220.91     |
| Total clean bases (Gbp)        | 33.14      |
| High quality reads             |            |
| Q20 (%)                        | 97.74%     |
| Q30 (%)                        | 94.30%     |
| <b>De novo assembly result</b> |            |
| Transcript number              | 86,396     |
| Total size (bp)                | 81,369,009 |
| Transcript N50 length (bp)     | 1,860      |
| Transcript mean length (bp)    | 941        |
| GC percentage (%)              | 35.59%     |

**Supplementary Table 2:** Functional annotation across seven databases.

| Values     | Total  | Nr     | Nt     | SwissProt | KEGG   | KOG    | InterPro | GO     | Intersection | Overall |
|------------|--------|--------|--------|-----------|--------|--------|----------|--------|--------------|---------|
| Number     | 86,396 | 32,756 | 12,014 | 22,852    | 24,514 | 21,018 | 24,900   | 17,754 | 4,510        | 37,261  |
| Percentage | 100%   | 37.91% | 13.91% | 26.45%    | 28.37% | 24.33% | 28.82%   | 20.55% | 5.22%        | 43.13%  |

**Supplementary Table 3:** List of limpet protein sequences tested with ISH.

| Trinity assigned ID | Manuscript ID |
|---------------------|---------------|
| Unigene47813        | P-vulgata_1   |
| Unigene46021        | P-vulgata_2   |
| CL3399.Contig1      | P-vulgata_3   |
| CL6799.Contig2      | P-vulgata_4   |
| CL6346.Contig2      | P-vulgata_6   |
| CL4559.Contig2      | NA*           |
| Unigene2524         | NA            |
| Unigene11734        | P-vulgata_7   |
| Unigene35700        | NA            |
| CL3409.Contig2      | NA            |
| Unigene36817        | P-vulgata_8   |
| CL489.Contig2       | NA            |
| CL5700.Contig1      | P-vulgata_10  |
| Unigene11944        | P-vulgata_11  |
| CL1231.Contig2      | P-vulgata_12  |
| Unigene15438        | P-vulgata_14  |

\*: Not applicable (NA), where a manuscript ID was not generated for a given Trinity-assigned protein ID as it was not included in downstream manual annotation and ISH was unsuccessful.

**List of primers used to synthesise ISH probes**

| <b>Manuscript ID</b> | <b>Primer Sequence</b>                            |
|----------------------|---------------------------------------------------|
| FW_P-vulgata_1_T7    | GGATCCTAATACGACTCACTATAGGTTCCACATCAACCTTGTTACC    |
| FW_P-vulgata_2       | TTTACGAATGTACGGCATCACC                            |
| FW_P-vulgata_3       | TGTGATGGAGCAAACGTACCC                             |
| FW_P-vulgata_4       | GAAAACGACCATGTTCCAATCC                            |
| FW_P-vulgata_6_T7    | GGATCCTAATACGACTCACTATAGGGCTGGGTTTCTCATTAGGTTCCG  |
| FW_P-vulgata_7_T7    | GGATCCTAATACGACTCACTATAGGTCCTGGTGATTTCAATGGTAGC   |
| FW_P-vulgata_8       | ATTCTATCGGCGCATATTACGG                            |
| FW_P-vulgata_10      | CAAAAAGAACGTGTTCCAGTCG                            |
| FW_P-vulgata_11      | CTGTTGTGGTTTACAACCATGC                            |
| FW_P-vulgata_12_T7   | GGATCCTAATACGACTCACTATAGGCACCCACCACAGTAGTTAGAGACG |
| FW_P-vulgata_14_T7   | GGATCCTAATACGACTCACTATAGGTTCCACTATGCGACACAAGAGC   |
| FW_PV2524_T7         | GGATCCTAATACGACTCACTATAGGTTTCGATCTAGGCAGAGAAATCC  |
| FW_PV3409_T7         | GGATCCTAATACGACTCACTATAGGTTTGAATTTGCTCAACAGTGC    |
| FW_PV35700_T7        | GGATCCTAATACGACTCACTATAGGGCCTCAAACAGGTACATTGG     |
| FW_PV4559            | TTGTCTTGAAGGAAACACAGC                             |
| FW_PV489             | GGAGATATTGGTGCTGTTGACG                            |
| RV_P-vulgata_1       | CAAAAGAAAAGGACGCAGATCC                            |
| RV_P-vulgata_2_T7    | GGATCCTAATACGACTCACTATAGGCAATGCCACAGTTACAGTTCC    |
| RV_P-vulgata_3_T7    | GGATCCTAATACGACTCACTATAGGTGAAATCTTTCCAGGGTTTGG    |
| RV_P-vulgata_4_T7    | GGATCCTAATACGACTCACTATAGGCAGGGTTTCCATCGAAGTTACC   |
| RV_P-vulgata_6       | TGCAAAATGTGATATGCTCAACG                           |
| RV_P-vulgata_7       | GATACGTGGTCCCAGAGAATCC                            |
| RV_P-vulgata_8_T7    | GGATCCTAATACGACTCACTATAGGAAAGGTACAATGTGTGCGATCC   |
| RV_P-vulgata_10_T7   | GGATCCTAATACGACTCACTATAGGTAAACGTGTCTTGATGGATGG    |
| RV_P-vulgata_11_T7   | GGATCCTAATACGACTCACTATAGGACTGGCCGTACTTGTCAAAAGG   |
| RV_P-vulgata_12      | AAATTACGTCGGAATGAATTAGCC                          |
| RV_P-vulgata_14      | CCTTACGAAAAGGATGGATTCCG                           |
| RV_PV2524            | ACTAGCTCTGGTGGCTTACACG                            |
| RV_PV3409            | GTAGAATGTACCGGCGAAGAGC                            |
| RV_PV35700           | TACATCGAGTTGTCCCAACAGC                            |
| RV_PV4559_T7         | GGATCCTAATACGACTCACTATAGGTTTCCAGGTCACCATCATAACG   |
| RV_PV789_T7          | GGATCCTAATACGACTCACTATAGGTC AATTTATTTCGGACGTGATCC |

# Supplementary Figure 4: Clustal alignments for SCO-spondin, Reprolysin, and Tc-MUC.

## (a) Multiple SCO-spondin precursors and *P-vulgata\_3* alignment

|                                                         |                                                                                                         |      |
|---------------------------------------------------------|---------------------------------------------------------------------------------------------------------|------|
| <i>P-vulgata_3/1-1604</i>                               | 1 MGIVATVILWVVEAARGRWCERTEQVTEEEVMPRRREDVPCPSMYOYSLAGWRIDLNRMRQYVGGERGVPPTSTHPGAAMYIRYRPPETQLVVR        | 96   |
| <i>SCO-spondin_precursor_[Gallus_gallus]/1-1600</i>     | 1 -MLLPAALLFGLMLWAPANGHWCQIEIETHVHEEVEVTPRREDLVPCSTLYHYSRLGWKLDLS-----WGHVGLTRP---PALGLCIAIKYKPPETRPATW | 87   |
| <i>SCO-spondin_precursor_[Rattus_norvegicus]/1-1920</i> | 1 -MLLPAALLFGLMLWQANGHWCQIEIETHVHEEVEVTPRREDLVPCSTLYHYSRLGWKLDLS-----WSGRVGLTRP---PALGLCIAIKYKPPETRPATW | 87   |
| <i>SCO-spondin_precursor_[Mus_musculus]/1-1919</i>      | 1 -MLLPAALLFGLMLWQANGHWCQIEIETHVHEEVEVTPRREDLVPCSTLYHYSRLGWKLDLS-----WSGRVGLTRP---PALGLCIAIKYKPPETRPATW | 87   |
| <i>P-vulgata_3/1-1604</i>                               | 97 NRTVRAACGAGWSPHCTEVEGSS---LQCHASWQCQDALGAHNLSTVMAECCRQPWGHWSRNGSSALCFACSRQPLTQDVI-----PIPTAPRG       | 182  |
| <i>SCO-spondin_precursor_[Gallus_gallus]/1-1600</i>     | 88 NRTVRAACGAGWSPHCTEVEGSS---LQCHASWQCQDALGAHNLSTVMAECCRQPWGHWSRNGSSALCFACSRQPLTQDVI-----PIPTAPRG       | 183  |
| <i>SCO-spondin_precursor_[Rattus_norvegicus]/1-1920</i> | 88 NRTVRAACGAGWSPHCTEVEGSS---LQCHASWQCQDALGAHNLSTVMAECCRQPWGHWSRNGSSALCFACSRQPLTQDVI-----PIPTAPRG       | 183  |
| <i>SCO-spondin_precursor_[Mus_musculus]/1-1919</i>      | 88 NRTVRAACGAGWSPHCTEVEGSS---LQCHASWQCQDALGAHNLSTVMAECCRQPWGHWSRNGSSALCFACSRQPLTQDVI-----PIPTAPRG       | 183  |
| <i>P-vulgata_3/1-1604</i>                               | 1 -----KFKSLASGDSLRTDFVYFNKSTEVTLAKTDFVTASDTCNAESICQKKIKITDQVNV-SATFSYVDGQVYVINSVKCFVTOEPEY             | 88   |
| <i>SCO-spondin_precursor_[Gallus_gallus]/1-1600</i>     | 183 PAARHRGRTASLTVWAGSRYSRDFRHFQFOEGEAMSLAASDTSWAVSITPFGSP-----VLMHTFLDVTVAQGHNSVNGVAPEGRQHLH           | 271  |
| <i>SCO-spondin_precursor_[Rattus_norvegicus]/1-1920</i> | 184 LWSQQRPSATLWAGSFGHYQTDGHHYHFLGQETYLLAGAMDSIWAHVRPVSVHCQPRQRWLVQVIMPECEVLIQDGEVSKGQPVVGGEPQLL        | 279  |
| <i>SCO-spondin_precursor_[Mus_musculus]/1-1919</i>      | 184 LWSQQRPSATLWAGSFGHYQTDGHHYHFLGQETYLLAGAMDSIWAHVRPVSVHCQPRQRWLVQVIMPECEVLIQDGEVSKGQPVVGGEPQLL        | 279  |
| <i>P-vulgata_3/1-1604</i>                               | 89 SDSLVNVVRSQSIYIKHSVGSSTLTKRVKDKDAAVYVLSRTGLIGSGVTEMCGDFDCTSDADLSADGFRKAMGDSQVLAGTCGQALP---           | 181  |
| <i>SCO-spondin_precursor_[Gallus_gallus]/1-1600</i>     | 272 CG---ISVITLQDFVAVESG---LVGLHKLDRGTVYVYSVAELRGSIKGLCCPYNDDIDDFLRVEVDGAPLAASFGNSWRIPDAN-----PEL       | 351  |
| <i>SCO-spondin_precursor_[Rattus_norvegicus]/1-1920</i> | 280 HG---MSLQWQDWLVLSGG---LVVVRLDRSSIISSVDFEFGWRTQLCGLYNGRPEDFVEPGGLLATAITGNSWRLPGS-----EP              | 361  |
| <i>SCO-spondin_precursor_[Mus_musculus]/1-1919</i>      | 280 HG---MSLQWQDWLVLSGG---LVVVRLDRSSIISSVDFEFGWRTQLCGLYNGRPEDFVEPGGLLATAITGNSWRLPGS-----EP              | 361  |
| <i>P-vulgata_3/1-1604</i>                               | 182 -----ECSETQLSVQAEFVYKSSMSAECHEGVDVNSVFMKEAVAAAVSEASAK---PARNRKMVAETEFANNE                           | 253  |
| <i>SCO-spondin_precursor_[Gallus_gallus]/1-1600</i>     | 362 CGLDVEVARGCELLGLTTLTGACLQADQDLVDDPDSQCHGQMPDEYHETGLFAYCVGATAGNPEEGQVKKYCATFANVAQAQARQH              | 457  |
| <i>SCO-spondin_precursor_[Rattus_norvegicus]/1-1920</i> | 362 CGLDAVEVARGCESLGLGTLTDLAEVLLQAQDMDHLLQPCFVQCHGQMPDEYHETGLFAYCVGATAGNPEEGQVKKYCATFANVAQAQARQH        | 457  |
| <i>SCO-spondin_precursor_[Mus_musculus]/1-1919</i>      | 362 CGLDAVEVARGCESLGLGTLTDLAEVLLQAQDMDHLLQPCFVQCHGQMPDEYHETGLFAYCVGATAGNPEEGQVKKYCATFANVAQAQARQH        | 457  |
| <i>P-vulgata_3/1-1604</i>                               | 254 VIVSRSFLLPVCVPAQMDVSCGSCRCRGNFYASLNKDECGRVPDCKPKPLVHNGAIVTADKESCKYQKDDNYNQTIVSENKQOTTC              | 349  |
| <i>SCO-spondin_precursor_[Gallus_gallus]/1-1600</i>     | 439 AYTEHRRPGLCEQGHGQRSDGVSSCFASMEACTAEFGHRDDASGCEETPLGLDRGAEIPQSAEPLHRGHITVPGASARH---STGEV             | 539  |
| <i>SCO-spondin_precursor_[Rattus_norvegicus]/1-1920</i> | 458 IYVHWKRGFERLIPGQQLDQGLISGCPFSISAVAQCEGSGCKEESVDCCEETPLFMDGAEVPAAHCPYRHRRAAGPDTKQCCPVEQD             | 553  |
| <i>SCO-spondin_precursor_[Mus_musculus]/1-1919</i>      | 458 IYVHWKRGFERLIPGQQLDQGLISGCPFSISAVAQCEGSGCKEESVDCCEETPLFMDGAEVPAAHCPYRHRRAAGPDTKQCCPVEQD             | 553  |
| <i>P-vulgata_3/1-1604</i>                               | 350 GLYVYVNVSRPSTTEIVGVSMKTFDGAIIHIGATTSTKFTLVGQ---ADLEISDITTKVSGINAVIKGVKVVYKGOAVEKNIDSSVRL            | 442  |
| <i>SCO-spondin_precursor_[Gallus_gallus]/1-1600</i>     | 535 ---GRWLTQRCAEACAVLDLHYITFRRRFSFPG---ACEVTLVDFVEGTRITAEQAEAGHQPISLRALSITVPGASARH---STGEV             | 621  |
| <i>SCO-spondin_precursor_[Rattus_norvegicus]/1-1920</i> | 554 ---GRWLEAQAQPRCEAVGDEGHHYTFDGRSFRGTPGEMYSLVQDSWKQQLVYLEHCAE---ETGSCHLASLAFKLGHTIQR---VSGAV          | 639  |
| <i>SCO-spondin_precursor_[Mus_musculus]/1-1919</i>      | 554 ---GRWLEAQAQPRCEAVGDEGHHYTFDGRSFRGTPGEMYSLVQDSWKQQLVYLEHCAE---ETGSCHLASLAFKLGHTIQR---VSGAV          | 639  |
| <i>P-vulgata_3/1-1604</i>                               | 443 ITSSDNTPMFVSGNFIYIKKVTLYYIEGNNRVVLEISDAG-RLTIRIOPAVYVNTAAGCKENYQNFIEELPSAGAGTSSEFLQAYSQDNGCA        | 537  |
| <i>SCO-spondin_precursor_[Gallus_gallus]/1-1600</i>     | 622 VVDGRVPLPFASAA-LTVRRASSFLLOTGAILWGLLETPAAYITLOPAFANKVRGLCTYNDQRDDATPAGDVEGVGTAFANKYRVSVD---         | 715  |
| <i>SCO-spondin_precursor_[Rattus_norvegicus]/1-1920</i> | 640 LVDDQDVLPIWGAEGFNVSASSTFLLRWRFGAWLVGWADPAVYITLDRHAYVQVQLCGTFTWKQDDLETAGDITESTVATFASKFQVSGDGG        | 735  |
| <i>SCO-spondin_precursor_[Mus_musculus]/1-1919</i>      | 640 LVDDQDVLPIWGAEGFNVSASSTFLLRWRFGAWLVGWADPAVYITLDRHAYVQVQLCGTFTWKQDDLETAGDITESTVATFASKFQVSGDGG        | 735  |
| <i>P-vulgata_3/1-1604</i>                               | 538 HFDITATKTSAMCNLDTMTVTSNTQ-----PTDVSCKELKEISADPLNVEPIAFALMDDGVYKQEFEAQNTLAKYKSCG                     | 620  |
| <i>SCO-spondin_precursor_[Gallus_gallus]/1-1600</i>     | 716 -CPVLSVPFPECTYAPRRELAALAAALIGHASFOPHHLDVREPHQLCLYDVCAPAGKHLCPALAAARECAQEAALSWRN---ESFCG             | 806  |
| <i>SCO-spondin_precursor_[Rattus_norvegicus]/1-1920</i> | 736 RCPVLVNTPLSSCSTYSQRLFAEAACAALIGHAFQECHELVREPFRLRCLLESMSCAPGRDCLLESVLAHYHCAQEGVLQWRN---ETLGS         | 827  |
| <i>SCO-spondin_precursor_[Mus_musculus]/1-1919</i>      | 736 RCPVLVNTPLSSCSTYSQRLFAEAACAALIGHAFQECHELVREPFRLRCLLESMSCAPGRDCLLESVLAHYHCAQEGVLQWRN---ETLGS         | 827  |
| <i>P-vulgata_3/1-1604</i>                               | 621 FTESYIFENQSVKSAKRDY---ALSTTCMEQVPCGSCPSRDRQDTSLSGMNSCATQAQCTCYDIASNEVTAAGTSRQRCQETESNAT             | 711  |
| <i>SCO-spondin_precursor_[Gallus_gallus]/1-1600</i>     | 807 TQCRGGQVYQESSPCGRTPCADLRDGAASPSIDNIVSGCNCPE-----PVLDDGQCVPVPCPCQSSRLSLQVPAQ-SKIRQNGAEMT-AG          | 895  |
| <i>SCO-spondin_precursor_[Rattus_norvegicus]/1-1920</i> | 828 VPPGGQVYQECAPACGHYCGEP---EDCKELG-SVAGCNCPP-----LWLDGQCQVPPSMCPLQGLGHAFYNTLTKDSCHEIQERG              | 912  |
| <i>SCO-spondin_precursor_[Mus_musculus]/1-1919</i>      | 827 VSPGGQVYQECAPVCGHHCPE---EDCKELG-SVAGCNCPP-----LWLDGQCQVPPSMCHCGFGHRYIN-ITTVTRHSDHEIQERG             | 910  |
| <i>P-vulgata_3/1-1604</i>                               | 712 LSCVDSQTDVIVSSGLKVDVTPTECRVPRPKRFEDASCTAEQTSLSRREIFVQWENEGKIAIETPCVIAEINWENHRAIDYMKTLQ              | 804  |
| <i>SCO-spondin_precursor_[Gallus_gallus]/1-1600</i>     | 896 TWS---CTDAPCP-DAFCRQDLYVYFSSPINDIICNEDSAEPICTG-IADGCVCPG-TVFDERCVPPRECPCOHNRHFNPDITVRDNTCEV         | 987  |
| <i>SCO-spondin_precursor_[Rattus_norvegicus]/1-1920</i> | 913 LWN---IAHHCPRQWALCQELIYAPGACLLTCDLGRANHSCLAGSTDCGVCSP-TVLDKHEVSDPLCPRHNGQWPPNATIQEDCNICV            | 1003 |
| <i>SCO-spondin_precursor_[Mus_musculus]/1-1919</i>      | 911 LWN---IAHHCPRQWALCQELIYYPGACLLTCDLGRANHSCLAGSTDCGVCSP-TVLDKHEVSDPLCPRHNGQWPPNATIQEDCNICV            | 1001 |
| <i>P-vulgata_3/1-1604</i>                               | 808 NNGVYSQAVQESSTEWASQPHYSITFDGKTKYQDQITWFKKTTTESVPPVQDVKENVVEGSTEVTCKAITINMNDLITLITRGEIKIG            | 903  |
| <i>SCO-spondin_precursor_[Gallus_gallus]/1-1600</i>     | 1005 ROQRWQSS-EDMGTETVATGDPMHITDGRASLGLDCEVYVREANG---LRTVAENVPCQTSVTVCTSKSVVEMENLVMHRLRQDVTVM           | 1074 |
| <i>SCO-spondin_precursor_[Rattus_norvegicus]/1-1920</i> | 1004 QNRWHTCQ-RQSGWQASGAPHYVTFDGLVTFPGACEYLLVREAG---RFSVSIQNLPCGASGLTCKTALAVRDLSTVHMLRQAVATVN           | 1093 |
| <i>SCO-spondin_precursor_[Mus_musculus]/1-1919</i>      | 1002 QRWHTCQ-RQSGWQASGAPHYVTFDGLVTFPGACEYLLVREAG---RFSVSIQNLPCGASGLTCKTALAVRDLSTVHMLRQAVATVN            | 1091 |
| <i>P-vulgata_3/1-1604</i>                               | 904 TTPYTPAMCFQOISITIVNAGLFTTFVDFEIVAMDDGGTRFANITSAWKKKKGKLCGNFBNIDNFTTETETAAEVEFNSWAGSCDQV             | 989  |
| <i>SCO-spondin_precursor_[Gallus_gallus]/1-1600</i>     | 1075 EVSVPFKVYSNGELTQRAGIFLLLSLRLGVALDQEGCTRYVIRIQPHQRVRLVGLCNFRDAENQLASQDGLVEATELFGVSLCEPVI            | 1170 |
| <i>SCO-spondin_precursor_[Rattus_norvegicus]/1-1920</i> | 1094 CVSILKPKVYTPGLSLHHAQGLFLLTLRLLGLLWDDGTRVLVQSPHFHGRVTLGCGNFDGQVSNLDRSLQVLEPTEALTAHSWRLNPLCEP        | 1189 |
| <i>SCO-spondin_precursor_[Mus_musculus]/1-1919</i>      | 1092 CVSILKPKVYTPGLSLHHAQGLFLLTLRLLGLLWDDGTRVLVQSPHFHGRVTLGCGNFDGQVSNLDRSLQVLEPTEALTAHSWRLNPLCEP        | 1187 |
| <i>P-vulgata_3/1-1604</i>                               | 1000 EAPLQEAALMTDQVNSPRTTWAKQCEVITGLVFNCRNINLDEVNKYTODLVDACGCDRGDCECLCTRISNFEANRAGAPAWRHRLC             | 1095 |
| <i>SCO-spondin_precursor_[Gallus_gallus]/1-1600</i>     | 1171 DGTAGQFPDQ---PHRTWARRESILRLTBLRFPKDEQVFP---CQHFDMKIFDAGCGSDDGCECLGTAIATVYAEESQRIHIRWSDDLC          | 1259 |
| <i>SCO-spondin_precursor_[Rattus_norvegicus]/1-1920</i> | 1190 G---DLPHPTVNV---AHRVWMAHAEHVLQPIFAPCHTEVP---PQOYEWVYDAGCGDTGGDCECLCSAIATYDQEAHRHHVYWSQELC          | 1276 |
| <i>SCO-spondin_precursor_[Mus_musculus]/1-1919</i>      | 1188 G---DLPHPTVNV---AHRVWMAHAEHVLQPIFAPCHTEVP---PQOYEWVYDAGCGDTGGDCECLCSAIATYDQEAHRHHVYWSQELC          | 1274 |
| <i>P-vulgata_3/1-1604</i>                               | 1096 IIOCEYGSVYKPCGSAEIKTMDPYGTYKGSFVQVTEVEGFCFPTDVMQAESEVKEIPQTECPETVQVYVYNNQDVIDDCKMKTGVSTFSD         | 1191 |
| <i>SCO-spondin_precursor_[Gallus_gallus]/1-1600</i>     | 1260 MDCDGGDESAICPPPEQTRN-LGLELPEHGDMSLEGGFCPEGKVLHEE---SIDPAECPFWQIIFADSDAVQDGRNCSITAGLWQCV            | 1351 |
| <i>SCO-spondin_precursor_[Rattus_norvegicus]/1-1920</i> | 1277 FLQCEGQVVEPCGSTEPTTCHD-HHSELRWQVTEIYVEGCFCEGTLHGQ---ADMKLAACEWQSFPPFTGLQKDCNCTCGSQWHD              | 1368 |
| <i>SCO-spondin_precursor_[Mus_musculus]/1-1919</i>      | 1192 FLQCEGQVVEPCGSTEPTTCHD-HHSELRWQVTEIYVEGCFCEGTLHGQ---ADMKLAACEWQSFPPFTGLQKDCNCTCGSQWHD              | 1366 |
| <i>P-vulgata_3/1-1604</i>                               | 1175 G---ANCTRETDGDFKQDDYVSKTLKNGIPNCRNVDVCKECSVEEFECYVNDQIPLNNTNINSGEDSDESVIAQTR-----                  | 1267 |
| <i>SCO-spondin_precursor_[Gallus_gallus]/1-1600</i>     | 1352 PTAEP-ADPHCPDSFPCRSRGRVPAALCDNEDDGDGSD---VCLALHAPHQRADQCVWGAACDGLSDCGDSDERGCPPPP                   | 1439 |
| <i>SCO-spondin_precursor_[Rattus_norvegicus]/1-1920</i> | 1369 P5GAPCEMEPCAGEALRRESGRCVLEWLDGNQDDGDCGSDGEGDTSVCGEGMSQSGRLELSLIEDGQDQDGTDEQGLCPQGLIAC              | 1464 |
| <i>SCO-spondin_precursor_[Mus_musculus]/1-1919</i>      | 1367 RGAPECEMPCAGEALRENGHVPLEWLDGNQDDGDCGSDGEGDTSVCGEGMSQSGRLELSLIEDGQDQDGTDEQGLCPQGLIAC                | 1462 |
| <i>P-vulgata_3/1-1604</i>                               | 1278 -----TSGSEFTTNGKIPKAFNCAANDCGFSDQEN-----CAPPFRASGRIPRAHVNGELDCGFADSDAEGCS-----                     | 1312 |
| <i>SCO-spondin_precursor_[Gallus_gallus]/1-1600</i>     | 1440 -----ADGRCLPPALLCDGHDPCLDAADAEESCLGWSGTSCEVSEVQDPEVRTIQLCGDVGWDPDGADEGPHVCSPSLPTFPAGIQGNPSTSS      | 1477 |
| <i>SCO-spondin_precursor_[Rattus_norvegicus]/1-1920</i> | 1465 ADGRCLPPALLCDGHDPCLDAADAEESCLGWSGTSCEVSEVQDPEVRTIQLCGDVGWDPDGADEGPHVCSPSLPTFPAGIQGNPSTSS           | 1560 |
| <i>SCO-spondin_precursor_[Mus_musculus]/1-1919</i>      | 1463 ADGRCLPPALLCDGHDPCLDAADAEESCLGWSGTSCEVSEVQDPEVRTIQLCGDVGWDPDGADEGPHVCSPSLPTFPAGIQGNPSTSS           | 1558 |
| <i>P-vulgata_3/1-1604</i>                               | 1313 -----CQQNEGVMSATPLIANRLLDGHDDCGDTEIGITTTGMTTTKVCKDINLDASTPDLWLRINSTSQPSVQALPKFSN-----              | 1400 |
| <i>SCO-spondin_precursor_[Gallus_gallus]/1-1600</i>     | 1478 -----PSVGEVFCQAG---RCVYVPHRNGHDDCGDSEDRGVCVAGHFQCPDQ---CLPPAALCDGMDQDGDDEAFCDPDIRITCAP---          | 1559 |
| <i>SCO-spondin_precursor_[Rattus_norvegicus]/1-1920</i> | 1561 VGSASPASPCSLSEFQNSG---ECPTRGWRCDDEEDTDCGDELDCGCPKLYQMPCAHCPHLSLPGQLCDGVAQCPGSDDEDPDVEERASGPP       | 1654 |
| <i>SCO-spondin_precursor_[Mus_musculus]/1-1919</i>      | 1559 VGSASPASPCSLSEFQNSG---ECPTRGWRCDDEEDTDCGDELDCGCPKLYQMPCAHCPHLSLPGQLCDGVAQCPGSDDEDPDVEERASGPP       | 1652 |
| <i>P-vulgata_3/1-1604</i>                               | 1401 -----TSTVWNPVTVGVTQASVITLQILVLAELVPTTTPMTEITGDTTGTITSTVTVSIVTTEPSSQYVYNNQVQIEMINNOCTEDGCDQIP       | 1488 |
| <i>SCO-spondin_precursor_[Gallus_gallus]/1-1600</i>     | 1560 -----QLPCPDGSEVSVKLLCDGIVDCRDG---WDESSVRCMSWAPPA-----                                              | 1600 |
| <i>SCO-spondin_precursor_[Rattus_norvegicus]/1-1920</i> | 1655 NGTAVPCPEFSCPNCTIDFLVCDGSPDCELADETPSLDQCGGTWGSWGPWPCSTCGPTQSRNRCNSISLHVLCNCPGLQHQSQCFTE            | 1750 |
| <i>SCO-spondin_precursor_[Mus_musculus]/1-1919</i>      | 1653 NGTAVPCPEFSCPNCTIDFLVCDGSPDCELADETPSLDQCGGTWGSWGPWPCSTCGPTQSRNRCNSISLHVLCNCPGLQHQSQCFTE            | 1748 |
| <i>P-vulgata_3/1-1604</i>                               | 1489 YITPESNATISVLDLSVAEYVLDLPLTSTPTMTEITGDTTGTITSTVTVSIVTTEPSSQYVYNNQVQIEMINNOCTEDGCDQIP               | 1584 |
| <i>SCO-spondin_precursor_[Gallus_gallus]/1-1600</i>     | 1751 ACPVDEGWSWSLWSPCESPEGGTMRHRQRCPQNGQDQCALPGSTHSTQTSQPCQEGCLNVTFCGLVFRPACPLTCDDISGEAVCSPPDR          | 1846 |
| <i>SCO-spondin_precursor_[Rattus_norvegicus]/1-1920</i> | 1749 ACPVDEGWSWSLWSPCESPEGGTMRHRQRCPQNGQDQCALPGSTHSTQTSQPCQEGCLNVTFCGLVFRPACPLTCDDISGEAVCSPPDR          | 1844 |
| <i>SCO-spondin_precursor_[Mus_musculus]/1-1919</i>      | 1749 ACPVDEGWSWSLWSPCESPEGGTMRHRQRCPQNGQDQCALPGSTHSTQTSQPCQEGCLNVTFCGLVFRPACPLTCDDISGEAVCSPPDR          | 1844 |
| <i>P-vulgata_3/1-1604</i>                               | 1585 CEDELPTCVTTTSTTEAT-----                                                                            | 1604 |
| <i>SCO-spondin_precursor_[Gallus_gallus]/1-1600</i>     | 1847 PCS5PGCWPEGKVLNTEGRCVRPQCPCLVDGIRWYQQRKIMKDCQLCFQDGGQPHRCRPNPECAVDCGWSWS                           | 1920 |
| <i>SCO-spondin_precursor_[Rattus_norvegicus]/1-1920</i> | 1845 PCS5PGCWPEGKVLNTEGRCVRPQCPCLVDGIRWYQQRKIMKDCQLCFQDGGQPHRCRPNPECAVDCGWSWS                           | 1919 |
| <i>SCO-spondin_precursor_[Mus_musculus]/1-1919</i>      | 1845 PCS5PGCWPEGKVLNTEGRCVRPQCPCLVDGIRWYQQRKIMKDCQLCFQDGGQPHRCRPNPECAVDCGWSWS                           | 1919 |

SCO-spondin *Gallus gallus* (truncated) and *P-vulgata\_3* alignment showing SCOR regions

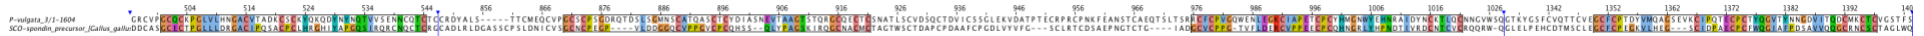

(b) Reprolysin CDD conserved sequences and *P-vulgata\_8* alignment

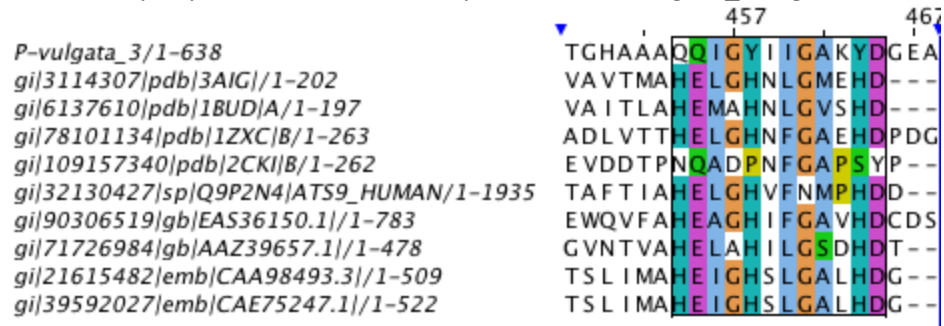

(c) Tc-MUC and *P-vulgata\_14* alignment

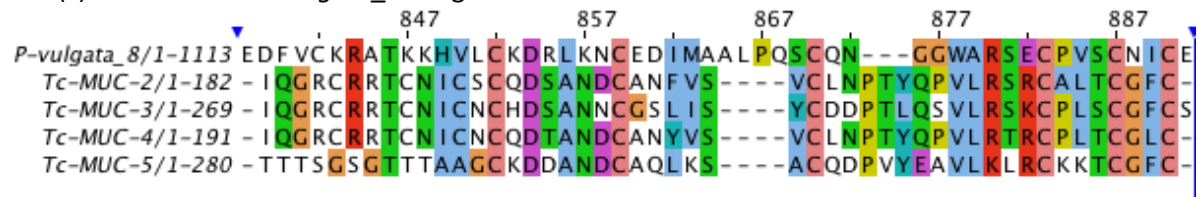

### Detailed protocol of *in situ* hybridization (ISH)

**RNA probe synthesis.** Primers were designed with Primer3 (<http://primer3.ut.ee>, v4.1.0) and for antisense/sense probe production a T7/SP6 promoter region was added at the 5' end of the reverse/forward primers. cDNA was generated from isolated total RNA of the limpet tissue, (same limpet individual as the one sent for transcriptome sequencing) using Transcriptor First Strand cDNA Synthesis Kit (Roche). PCR reactions were performed with Q5<sup>®</sup> High-Fidelity DNA Polymerase (NEB) and their correct length verified on a 1 % agarose gel. The PCR products were purified with Wizard<sup>®</sup> SV Gel and PCR Clean-Up System (Promega). To synthesize single stranded digoxigenin-labelled RNA probes, T7/Sp6 polymerase (Promega) and DIG labelling mix (Roche) were used according to manufactures' protocols. DIG-labelled RNA probes were precipitated with isopropanol and bands length and intensity checked on a 1 % agarose gel. RNA probes were diluted in hybmix to an estimated concentration of 5ng/μl (based on gel images) and stored at -80°C until usage. Probes were used at a final concentration of approximately 0.2 ng/μl. We repeatedly observed unspecific background staining using sense probes, which should not be able to bind to any mRNA specifically (supplementary figure 4a). After extensive troubleshooting we realised that the precipitation with isopropanol was not sufficient to eliminate unbound DIG-labelled nucleotides, which were the source of this background staining. Please also see *background staining in the in situ hybridization experiments* addressing this issue.

**Paraffin section *in situ* hybridization.** For section *in situ* hybridization, Patella tissue was dissected and fixed in 4% PFA in PBS overnight. After several washes in PBS, the tissue was dehydrated in an ethanol series until 100% ethanol. Tissue pieces were treated with xylene for 8 and 5 min and immediately placed in 60°C preheated liquid paraffin wax. The tissue was moved to fresh preheated paraffin wax every hour for three times and left at 60°C overnight. Afterwards, the samples were moved to room temperature for the paraffin blocks to harden. The paraffin-embedded tissue was then cut into 14 μm thick sections using a Microm HM 340 E microtome. The sections were placed on Superfrost ultra plus<sup>®</sup> slides (Thermo scientific) and heated in an oven at 60 °C for 1 h and allowed to cool down for 15 min. After dewaxing in xylene and rehydration, sections were postfixed in 4% PFA in PBS for 20 min, washed several times in PBS and treated with 0.2 M HCl for 10 min. Following washes in PBS, sections were treated with Proteinase K (20 μg/ml) for 20 min. Sections were postfixed in 4 % PFA in PBS for 5 min, washed in PBS and placed in 0.1 M triethanolamine (pH 8) containing 0.5 % acetic anhydride for 20 min (exchanging the solution after 10 min). Afterwards sections were washed and gradually dehydrated with ethanol. To dry the sections, Chloroform was dropped on the sections and allowed to evaporate. Slides were placed in a humidity chamber and incubated with hybmix at 55 °C for 30 min. Sections were incubated with RNA probes diluted in hybmix (0.2 ng/μl) overnight at 55 °C. To avoid evaporation of the liquid, sections were covered with fresh parafilm pieces during this step. The following day the sections were incubated in 50 % formamide in 2x SSC at 62 °C (3 x 20 min). After washes with 1x SSC and PBS, sections were blocked in blocking reagent (Roche) for 1 h at 4 °C. Sections were incubated with Anti-digoxigenin-AP Fab fragments (Roche) 1:2000 in blocking reagent overnight at 4 °C. Following several washes, the signal was developed using the NBT/BCIP system (Roche) at 37 °C. Colour reaction was stopped with ethanol and sections washed several times with PBS. Sections were mounted in Mowiol<sup>®</sup> 4–88 (Roth, Germany), prepared according to the manufacturer's protocol and images were taken with a Zeiss Axioscope A1 microscope.

**Background staining in the *in situ* hybridization experiments.** For ISH negative control samples, we used DIG-labelled RNA sense probes that should not bind to any mRNA sequences. However, we repeatedly observed unspecific background staining in the negative controls in glands ~100-150 μm from the epithelium, in the epithelium and secreted mucus (supplementary figure 4a). No staining was observed when no ISH probes were added to the samples (not shown). For interpretation of ISH results in this study, we only considered probes that consistently stained differently to the background in two to three repeated ISH experiments. Using *P-vulgata\_3* as an example (supplementary figure 4c; modified version of Figure 3b), the positive stainings were distinct in intensity and locality compared to background stainings (supplementary figure 4a). Subsequent troubleshooting by B.L. in Mons, where all the ISH experiments were conducted, identified the probable cause as short DIG-labelled nucleotides that freely bound to unspecific regions of the tissue. When negative control probes were additionally purified through a Micro Bio-Spin<sup>®</sup> Chromatography Column (Biorad) and re-tested, the unspecific background staining issue was



resolved (supplementary figure 4b). Unfortunately, data collection for the project had concluded several months prior to this clarification, and the lead author had already returned to Cambridge, UK, hence ISH could not be repeated again. Nevertheless, by carefully considering the differences between background and signal staining patterns and by upholding a high threshold for inclusion, we are confident that we have reported valid results for the five candidate probes (shown in Figure 3 of the main text).

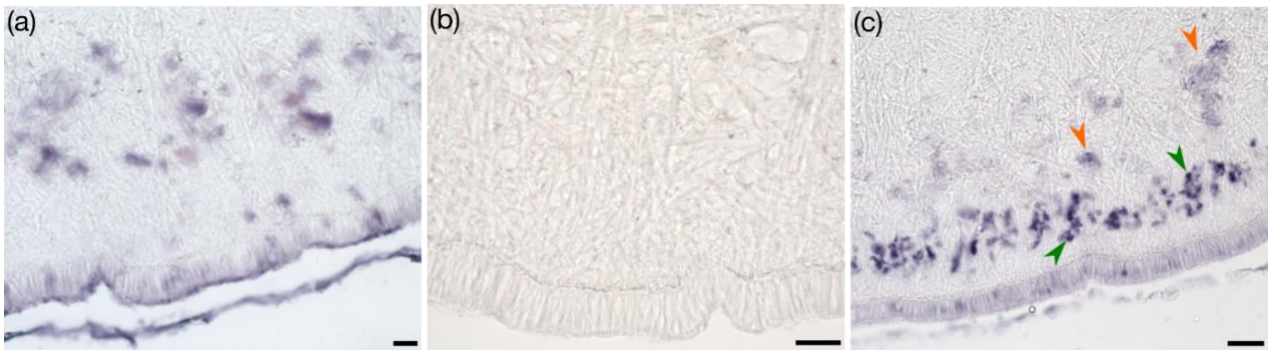

**Supplementary Figure 5:** Unspecific background staining due to DIG-labelled nucleotides present in the ISH probes. (a) Unspecific background stains in the negative control samples were diffuse and localised to ~100-150  $\mu\text{m}$  from the epithelium. Scale bar 20  $\mu\text{m}$ . (b) When negative control probes were additionally purified through microspin columns, background stains were eradicated. Scale bar 20  $\mu\text{m}$ . (c) *P-vulgata\_3* staining, showing the distinct staining pattern between the signal (green arrows) and the background (orange). Based on our prior experiences with ISH, the sharp intense stains indicated by the green arrows are indicative of positive stains. Additionally, the background and positive stains were segregated by location within the tissue. ISH probes that did not fit these criteria were not included in the analysis.

**Additional information on PX26-30DV pressure sensor calibration:** The pressure sensor was calibrated by connecting a syringe pump to an analogue pressure gauge (WIKA Instruments Ltd, UK), which in turn was connected to the sensor port. The syringe pump was used to increase the pressure (relative to ambient) from 0 to +40 kPa in 10 kPa bar steps, and the same to decrease the pressure from 0 to -40 kPa. Sensor output voltage was then plotted against pressure, and a linear regression (intercept set to 0) was fit to obtain the relationship  $\text{Pressure (kPa)} = 8.6979 * \text{Volts (V)}$ , with a Pearson's correlation  $r^2 = 0.9995$  (see below). This linear model was used to analyse the in vivo sub-pedal pressures from *P. vulgata*.

**Linear model used for calibrating PX26-30DV pressure sensor**

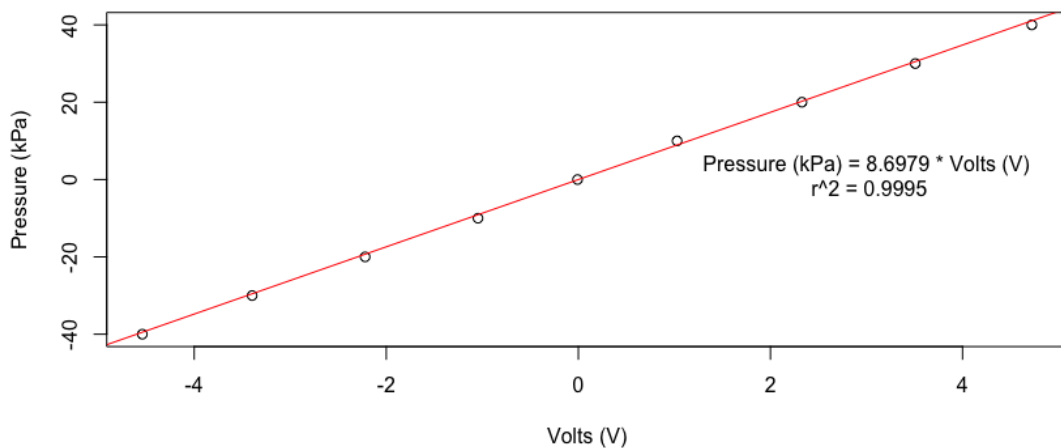

**Additional information for manual vertical pull-off experiments:** for the trial shown in Figure 3c, the limpet had been disturbed previously and had clamped down, corresponding to the slight negative pressure (around -1.4 kPa). The pull-off force was applied by gripping the limpet's shell with fingers and pulling upwards starting from ~20s until detachment at ~25s. Because of this method, we cannot state with confidence whether the applied detachment force was constant during the whole duration. For this particular trial, we observed an initial negative peak of around -2 kPa, followed by a second much larger peak of -5.7 kPa, and then the pressure returned to -2 kPa for ~3 s before full detachment. One possible explanation for this second dip is that as the limpet was being pulled, it attempted to clamp down, which would result in a decrease in sub-pedal pressure. Once it relaxed, the pressure returned to around -1.4 kPa, before being fully detached. We wrote in the Discussion that clamping can lead to a sub-pedal pressure reduction, although this still requires adhesion between the contact area and the surface, which we propose is provided by adhesive mucus.

**Encoding cDNA sequences of the fourteen annotated protein (see Supplementary Table 3 for identifiers)**

>Unigene47813\_L1\_2\_1

GAGTTTGCTTTAAGTATTATTTATTTATAGTCCATAATTGAGACTAATTTATAGGATTTAAATATTCTGTTTGTTCATAATATATTATTGCATTTAAAAATATAC  
 AGAAAGATTAGAAATCTCAGCAGGAACATCTTTACACTTCTGGTCTTTATCACCACAGACACAACCTAAGTACTGACATAACCTCCTTTGGTATTGTTGGG  
 ACAAACCATTCCTGTACATGTAACATTAACCTTATATATTCTACTTTTTAGGTCGGCAACAACATTAGTACCACCATCACAGTAGCCTTCATTACATAG  
 GGCTATAGTCATAACTTCAGAATTACATTGATTGTTGACTGCTACGAGAATATTTGTATGTTTGTGGAAATGGACCTTTTGGAGCATTGTAAGAAAGATGG  
 TCGTTTTCCACCAGCTTGGCAAGCAGCTGGGTAGTATTCATTAGGATGGTAAGTACTGACTTCTGAATTCGGCAACAAGGCTGTTCTGTTCCAGATGACATCTGGA  
 AGAGTATGTTTAGGTACGTACCTCCACTTTAAGACTCGTCCACAGTAAGGATCAGCAACTTTAGGACAATCACTAAAATCACATTCATTGGTTACAGGAGG  
 CATGACAGTGTGACGAGAACAGCGTGGTAAATCACAGTATCCATTTACGCTGTCGATTCACTTGTAAATAATTCTGGGTTGGTCCAGTGTAGGTCCTAGT  
 TCTTTCTGACACCCATAGCGGTACACAGTCTAAACCAATAGGTTGTGGTTTACAGTCTGACCAGATGGACCATGGCTCAAAATCAGATTCAGCAGGTGT  
 AGGTGCTTGCAGTGTAGTGGTTGTCGGTGGATTGCATACACCTAAGGTATATATTGGTAATTCCTCAGGATTTTCTTTTTCTGCAAACATATATGCATT  
 CTCAAATCACAGAGACTTGTGAAGTCTCTACCTCTACACAGCATCCGCTGTGGATAGTTCATAGTTACTACAGATATCATTGAACTGCATGGATTTTTCG  
 TTGTGGAGGGAGCTTCTGTGGTTGTGGTTGTAGTTGACTTGTAGAGGTTGTGGTTCTGTAGAGGGACATTTTCCATAAATTAGCAATAGTAACGTTAATAT  
 TGGATTCCCATATTTGGCACAATTGACTTGATAAAGTTCTTTGTAATTGCTGTATGTTACACCATCAGAACCACATACCTGAGCAGGTGATCCATCTGTTGG  
 TGGTCTACATAGAGCTGTGTACAATAACAACATCGTACTATGGTAATCCAGTATTACGTTGACATTTAAACCGGAATGGACCACAGGACGGGCCA  
 TAGTGAATCATAACCATAACAGCAAGAGCAAGCATAGGCTCGTACACTCTGCATCTGACATTTGAGTGTCTGGGATTTCTGGGCTTCTGGTCTTCTGATTCTCGAC  
 ATTCATTGATTTGGCACAACATTGAGTGAATTTTTCTGTATCCGCTCTTACACTCGCATTCAAAGAACCAGGTTATTTTTACATTGCTCATTGATTCTA  
 CAGTCGTGTAGATTAGCCTGGCATTATCCAATCAACACATGTGTACAATCAGAGACATAACCGGTTTTACATAGACAGACCTTCACATCATCTCATCC  
 AGTTGTACAGTAGCACAGAACTGCTGTCTGTTTATCACCTTTCTGCATTCAACCTTAGCATCACCTAGGTATCCATCAATACACACAACAGCTATTTCAAT  
 GTTTTTAGTACCACATTTGGAATTTGGTATAAGTGTATTTTACGTTCTTCAACAACCGCTGCTTTACATACAAACAATTTAGAACAGTACGATTTAACCCATT  
 CGTCATTAATCTCAAAATATCGTTCTGAATTTGGATCCTCACATCCACATTCAGAGAGAGGTATACATCTCCATTTTGCAGGAAGAATCCAGCACGACATAT  
 ACATTGTGGGTTACGAGGATTTGCTTACCTTCATTAGCTAGCATTAGGATATTTGTTACTACATGTAGGGAGTTCCTGGGGTGGTTAAAACCTGAATACCAT  
 ATTAGTCCACAGCTTCAACACAACAGTTCGCATCAAGATTCACTATCTACTTGAGACAATATGTAATCTTACAGTCTACAGAGATTTGCTCAGTT  
 AACACGTCACAGAAATCCACCCCTTTCAGGCTTTTGTAAATCAACTCATATAAATCTTGTGATTTGAACAGTATTAAATGGACCGTCAACAAATTA  
 TACCACATTTGTTAGCAGCAGACATTGTAGAAGGGCATGCGCTGGTGGAAAGAATTTCTGGAGGGGGTGTTCACCAGGGGCTAGGATTAGGAACCTCAGT  
 TGTTGGGATAGATGGTGGAGCATCTGGTACGGTTGTTGGACTAGGTTGATTAAGTGGCTGTGATGGTTGGGTTTCTGGATTTGGGGGAGTTGCTGGTCCA  
 GGACCTGTGGGTGACTCCGAATTTGGTGGTGGTGGTGAATTTCTGGTGGTGGTGGTGGTGGTCTTTATCAGTATTTCTGTATTTGACTCTCCAGAGCCA  
 AGTTCACTACATCTATCAAATGCTTGAAACGTCCTACTGTCTAGCAAATCACAGGATCCACAAAACCAACAACAGATGTTATCTCTGTTTCCAAATTA  
 CTGTATCTACCATAACATTTGAGTTTGGCATTGCTAGAAAATAAATTTCTAGCTGACTGCATAATCTTAATATCGGTGTACTTTCTCCATCACTGTAG  
 AATTTCCCAATCACTCAACTCAAGTGTGTTACTGAAACAAGTGTCTTGAACCTTTATCTAATTTTACGACATATGTCCTCCACTTTTAGCTTTAAT  
 AACCTTTACATTTAATTTTTCCGGAGAACAACAGTCTTCTACTAAGGTACTGTACAATCTCCAACCTTCTGCGATGGTAATCGAGCAATTAATCTGGTA  
 ATCATGAAAGTATTACCATCACTGGGCATCTGAATGACATTTTCTGTGGCTAAACATGTTTTCATCGTGAAGAATGTCGTCTGGATCTGAGCAATGACAG  
 CTGAAACTGCCCAATCATCTGTACATTCAGTTCATCTGGACACAATCAACCCCACTTCTGCTGATTTCATCGATATTTTTTACATTTTCTTGGACAGT  
 ATAATCTGTACATGAGTTCATATCACCACCATAACAAGTATAGAGTCCCGCTTGGTCGAGCTTACATACTGTTTCTGTAAACAGAGTTGCATCGGAAAC  
 AGGATCACATTTTACATCCATAGGGAACGTACAGATACAGGTAGGATCATCAGTTCGGATTTCTGGATGCTTCAACTTCAATTTGCATTAGTACATCACT  
 CCATACAATTACCAGTGTCTACAGTTTTAATTTTCTGTTTCTGTTTCTGTTTCTGTTTCTGTTTCTGTTTCTGTTTCTGTTTCTGTTTCTGTTTCTGTTT  
 GATAATCCAACGCATTTAAACCAGTTGTTTCCAGCACTGCTGTCTACCAGATTTGATGGGAGACGGAAATTCATATCCAGGATCTGAAACTTATCATTG  
 CTTTCTTTTCTAATTTGTTTACTCCAGCAACATAGAATGACCTCCAATCTCAATCTCAATTTTGAATTTCTGCTAATTTCTGCTTTCTGCTTTCTGCTTT  
 AGCAAGTATCTCCTGTTGGTTACAGTCTGTACAGCTGTACGCTATACCTTTTCCCTTGGACATAAAACACACTATTACCAAAATTTCTGGAATTTCTCC  
 TGTACATGTCTGATTTCTTACACATATTTATCTCTACATTGAGTTTGAAGTTGTCACACGAAATTTCCGGTCTAGAATATCTAGGTTACATACTCTTG  
 CAGTATCTGCAGGCATTGTAGCTCCGTGACCAATTCACATTAGATTTACATTTGACTTCTCAGAACAGTTTGTATTCAATGTTACTTTCATCAACATTTATC  
 ATAAATTTTTTCTGCTGTTTCCGTTATCAATTTCAACAACCAATTTCTTTTTTGGACATTTAGTTCCTTTCTGTTAGTGTCCCTTCCATACACACATGT  
 CTCTGGGAGTACCACTACATGTTGCTGTACGTTATGATGCTCCACATCTTATCACATTTAGCTAGATACATGACTTGTCTATTGGGTTTCATCGCAATCC  
 AATTTACAGAAATCATGTTGCGCAATCCTTGGTTTACCGGTTTTCAAAATCAAAATGATAGATAAATCTACCATCTTGGAGCAACAATTTTTTCTGTTT  
 TTCATCTCCCACTTCTTCTGACAGACATCAAAACACAATGTCACAGACTGTGATTTTCAAATCTTTAATTTTTCTCATATTTCTGATACATATTTCA  
 TTGTACAGAACTTTAGTTGACCACAGAAATCTCACTACCAAGTTTTCTTCTGCTGCTGACTACAATCTGTTACAGTTGGTACTGTTACTACTACATCCAGC  
 ATTTTCTCATCATCGACTTGCCAATCATTGCCATATTCAGTGGCAGAGGATAGCTCCCATCGTATTTTCTATTCTGCTGTATGTTGGGGTGAAGAAAGAG  
 CCAGCCCTCAATTTATAGCTGTTCTTTTGTACACCAATATTTCCACAGATACACACATGAGGCCGTCGTAGCCACTCGGTGTATCAATATATATCTTAG  
 ATCGGCGTCAACATGACCGACAAAGCATATGGAGTTGTAAGTCTAGTTTCTTACCAGTACTTCTGCTACGAAATATTTTGTCTCTTTTGTGTTTCCACA  
 TCAACCTTGTTCACCTGTAGTTTTCCATTTGAGCTAGTCTGATTGTGTCAAACGTAGAAATCAAAGTTGTCCTTCTCATGGTAGATTGTAACATCAATAAT  
 CGGTGCATGTGACATCTTTCCCGGTTTGGCACACTTTCTATTCTTACATTCTACTTTAAACAGATCTAAATCTTCAATTTGTCATTGTTTGTGTTGCGACAC  
 CGGAGATGAGGTATTTGCATTTTCCGAAGAAATCCAGCATGTCCCAGCATATGTTCTGCAATGAGGATCACCAGTACAGGAGCACAGATTTCCACTGACA  
 CATTGCTTAAGCTTGAATTTCAATCTGCTCCAATGGACATTTACAGAGGTAATGACCAAAAGTGTCTACACATTTCTGGCCACCGGGACAAGCATTAGAT

CCTGCTACATCGCATTCAATGACATCCTCAGGACATTCGAATTTACCTTATAGTTCTTACAGGTTGGACCCTTGCAAATAAATTTATTTTTGGTAACTTCTAT  
GCGATCTCCATCTCTTTCTGTGGCTCATAGGTTATTTAAATGGTTTCAAACACACAGGTTTCAATCTGATGATGGCCTGTTTAAACAGTTAATTCGATTTTGT  
TTTCCACGCTTTTAAAGTTTACCTCAACCAATACCTTCTTCGCTTCTGAACCTCAAGAGGATCATATTCACACAATGGATATTTCAAATGATGGCAA  
TGTGCGTTGATCTTAACTGAATTTACCTGGAAAGCAGATTGCCAAATCCTGCAAGTTGCCCTTGATCCCCTTGACCTATTTCTGGATCTCGCTCTTTTCTTT  
GTTTCTCTTTGATCTGCTGCTTGTTCGG

>Unigene46021\_L1\_2\_1

GTTTAAAGTTTTGAATATACAAAGTGACTAATAAGCTTGTAGTGAAGGCTTATCTTTGCCTTAATCTGTTCAAGTTGATCAGACTGGGGTGAGCTAAGTTGCCG  
ATAGTTCTGTAGGCAAGTAAAGGCGTTCCGACGCCAAGAAATCAAACAATATGATATTTATTGCTGCCGCGTCTGATCTTTATGCACCAATCGCTTCT  
GCAGTCGAGATACCGTTACTCCCTGGTAATTGTTCCGAGGCGTATTTTTCTGTCAATAGCGAAATGCGAAGAGGTAATGATACCAGTTTATGATGT  
GTGTGTGAAGCTGGAACAATTGGTGTGATGAAAGCAGAGGGTCAATCCGGCTGTAACACACTGTGTTCCATGTAATAAGCTAACTGCCACAT  
TGATGGATACTGTAATAAGACAGATTCTGCCCTTCTGTGTGAATTGCAAAAAGGTTTTACGGGAGATGGCAAGAACACTGTGATGATATCGACGAGT  
GTTTAGCCAACTGTGACCAGAACGCCAACTGTCAAACAACAACTGGTTTTAAATGTGTTTCTTCCAATGTTTACCGGTGATGGCTTCAAATGTT  
CTCGAACATGTAGTGTAAACAAGACTGTTTTCAACCTAATGGTGATGTATAGAAAATTACTGTAATGTAACGCTGGTTACTGTTGATGCTTTTACTG  
CTTGTGATGATATTGATGAATGTAAAAGTGGAGACTTTGTCTGTACAGACCCAGCAGTTTGTGTTAATGAGCCCGGTAATAACATGTGGCTGTCCAAATG  
GTTACAAAGGAAATGGTGAACATGTACAAAATTACAAAAAAGTGTATGAAATATACCAAGAAGATCCTTCAGCAGTTAGTGGGAGAATGTTTGAATA  
GACCCTGATGGTACTGATCCGCTGGATGCCATGCAGGTGAAGTGTGAATTCAAAGATAATATGGGATAACAATAGTTATAGCTTCAAATAACACCTCA  
ACCAATCACTACAAGAAACACCAAGTTGAATAAAGGGTATCTCACCAGAACAATTAAGGTTCTGTAGATAATCAGAATCTGTTATCAAATCAATG  
GATAGAATGTACTGGAGGATATAATCTATCAAGACAATGTGAATGGAATGGACAGACTTAAATGGTACTACATATGTTGGGAGGATCTGGTCAG  
GATGGAAATTGTGCTTGTGGTGTCTTGGATTCTGCGATAAGGGGAAAACCTGTAATTGTGATGGTTCTACTGACACCGTGATTGTTTTGGAAAAAT  
ATCGATTCTGCAAGATTACCAATCAGTCCGTCAAATCAAAGCTGGTTCGGGATCAAAGACAGCTAGCTATGTCATATCCGATGTAAAATGTGCACCCAAA  
CCAATAGATTTATACGAGATTGCGATGAAATAAAGAAAGATGGCGTGAGTGATAGTGGGCCACAAGTTATAGATATAGATGGTCTGATGGTCTCTCCA  
ACCCACCTTAGTCACTGTGATATGAAAACGTTTGTATGTTGCTATAACTGTTGTGCCCCACGATAAACAACCTCAAATTGTGCCAACAGAATCTGGTTCT  
ACTCCATTAATATGTACACCATCCGACGTAATAGCTGGTATCATCAATGGATCGGCATTCTGTTATCAAGAAGTCAGCTACACCTGTAGAAATCTCCTA  
TTAATAAATGGTGAACAATGTATCTGTAAGTGTGGTAAGGAATCTAGAAATGACTACTCCCTGGTGGAGAAGGTGTGGCCGTAATGTGGG  
TGTGGTAACTGGTCTGTGTTGAAAAGAATAACAGTGAATGTGATTAATGAAATGAAATGTTACCAGATGATGATGTTACGAGATATGATGACAGCAACCTCAA  
GACTTACCAGTAAGGTAATACCAGTGTAGTACGTAAGTCTTATCTGTAAGTGAATAAAGGACTGATGTGCGCTAAAATGCAAGTTTGGTATT  
GAACCGAATTGTGAAAATATCGGGCAACAGGAAGAACTGAACCATACACCTACCTGATAGATCCGGATGGTCTGCTGATCCTTCAAACCTGATGACTT  
AAATGTTGCACCAATTTGCTGCTGAATGTCAATTTACAGAGTATCCACCACAAGGTGTTACTATAATACATCAGATACAGAAAATCCCTTCAACTAACGGA  
AGCCAATTTTTCTTTGAGATAGTCTACAAGAGAATAATTAGTGTATCAACTAGACAGTTACGTACCAGATCAACTATTGTGTACAGGAATATACATT  
AACTGTGAAAATATCATCTACATCTTCAAGTGGGGGTGGTGTATTCTGGAAGGATGTTGATGGTCAGCGGTATGATTACTTGTCTGGTGGAGCTGAGG  
GTGATGTGGGCTGCAGTTGTAACGCATCTCAAATTTGCTGCAAGGCAAAACCTGTAATTTGTGATGCTATGAGCAGTAGCCTTCAAGCCGATTTCAATGAG  
TTAGGAAATGTAACCAATTTACCCGTTTCACTACTAGACTTTACTTCTGCAACGGTCAGCTTTCAGTGGTCCAACTGTTAGGAACTTTAGGTTAGGTC  
CATTGAAATGCTATGAGACTTTCCCTACTGCTATGATTTATGGGCTACTGAGAACAGATCGTTAATTGGAGAAACACCAAGATAAGTCTGGTAAATACA  
CCATCGATCCGGATAGTTCTGGTGGTGTCTGCTTACCCTGAACCTGTAACCTTCCATTTACGTCAAGTCTCTGTAGATGGAAGTGGTGGTCTCCAGGAC  
TCGGCCAGTCGCAATGTTTTGAAATCGTATATAAAGATAACAATGGGAAACCAATTACACCAGCACAAATATCGGCTTATAGTGGACAATCGAAGGCGTGT  
CAACAGTATCTTGGTTATGCTTGTATCAATGCTCCTAAGACCAAGAATGTAATTTCACTACCTGTGATGGCAAGGCACAAGTTGGTTGGGCTTTAAGTGGT  
GGATATGACAGCTGTTCTTGTGGCTTAACTGGTACCTGTGAAGTGGACCACAGAATTCATGTAACCTGTGATGTACAAGATGGTACCAAGAAAACAGACG  
GAGGCTCTATCTACAATACGACACGATTACCTATCTGTGAAGTGTGTTAGGTTTGGACAGCGTTGACACTCTCCGACGGGTCAACAGACCAGGGGTAGT  
GATTTAGTGTCCGGACTTTGAACTGCTTGGATAGCTTTGATGGAAGAATAATGTAATGATCGACGTCTAACAAAGAACCGGAGGATAAGGTATATTA  
TCTAGTACTGATAACTGATCTCTGTGAAAACCTTTCCAGTATCTGTGACATGGTACCATCCCTGCTATGGGTATCGGAAATGAGGCTTAAAGGCTAAAGA  
GTCCGAATACCAATCCCTGCCAACCAACCTTTGATATCAGCATCACCTACTTTGTGTATAGCCAAGAAGTAAATCAACTGATAGACAATCTTATTAC  
TGTACACAAGAGATCTATACATGTAATAGTGGTCTTTAGATTTAACTGGAACCTAATGGATGGTATGCTAGAGATGGAACACCACAAGATGATTGGGG  
AGGAAATATTGAAAAACAGTAAATGCCAGGACAATGGTCCGACTGTAACCTGCAATAAAGCCGGAAGTCAAGTTGATGGAGGTATTTAGGTGATAA  
ATCTAAGTTACCAATATCAAGAGTTAAGCTTGGACCAAGCACCAGGCCAGAATCTCAGATTTGGGGCAGTGAAGTGTATGAAATCAGAGCTGACTGCT  
ATGATATCATGAAGAGTGGTGATACTAAAACCTCATACAAGAACGGAACCTACGTCATTGACCCGTGATGGTCCGGATGGCGTTGATCCATTTATTGTTAAAT  
GTCATTTTGAATCAAAAGGGGACAACGCTGTTACTGAGGTTGTTACTGAGGCTCAAGGACCTAGATTTTATGATGGAAGACAGTACCATACTCATATTC  
ATACCTTATGAATCAAAAGGAGCAACAGAAGAACAGATAAAGCTTCTGGCCAGACAGCTCATTCTGTATCAGGGAATTTACGAAATGACGCAATC  
ACCAATATCTGGTAACTCAATTAATGAACCTAATAATGGATTTATCTCACAAGCTTTGGAACCGGTTCCGAGACCAATGTTAGTTCATGTCATGTCAT  
CTTGGAACTGTGATGGTTCAAATGTGATGCGACGCCAAGGATCAATGGTAGCCAACGACAACGGAACAATCAGAGATAAAAATCTTCTGCCATTAC  
AGAGGTCAGTCCGGTGGCCAGACAGAGTCTGGTGAAGAGCAGCGTTGCCGTCTCTTCTGTTCAATGTTCAGAAAGACCTGCGGGTCCCAAGGAT  
TGCGAAGAGGCTCACAAACCTGGATACAAAAGTGGAGAAGTTATGATATACCATCAGCTTCTTATAGATCCCTTCTTCTGTTTATTGATATGCAAGTAAAA  
CCCGGTACGGTGTGGCTATTATCAATCCAACTTAGAACAGAAAACAAAGCTTCTTTTAAATGGTCAACCTATAGATGTACCATACAAGGGACTCACGAAT  
GAACAAATCAAGCAATGTAGATGTTTCTGCTAACTGTTACCAACCCGTGAAATATAACTGTAGAAATACAGCATTCAATCAGCTAACAAATTTTATG  
AAGAGTATTGATGGTAGTAAAGTATTTGGAGCTGGTTCACCAGCAGGAAGAGATTGATACATGTCGACGAGAAAATCTTTGTGAGGTTCAAGGCG  
GTAAGGACCACTGCAAAAAGGAACTGTAACCTGTGGCATTGGAGATAAATCAGGATCGATTGATGCTGGTATCTTTTCCAAACCAAGAAATACCAAGTA  
AGGAGTCTTGTATTCTACCTACAGGAAATCAGGATCACAAAGAAATATAACTATTGGTCAACTATATTGTGGACAAACAACACTAAAATTCGATGAATG  
TACAACAGGATTCATGATTGTCATGAGTTAGCAAGATGTTAAACACTGACGATGGATTTGAATGCGTTTGTCAACAAGGTTACAGAGGCCAAGGACGAT  
GGAATGTTGGGCGAACGGAAGAGAGTGTCTTGTGATGATGAGTGTGCTTTCTACCATGTCACATTAGCTGTTTGTGCCAATCTCCCGGTTCTTTTA  
ATTGACTGTAAAAGCTGGTTATTTATCAAACAGTCCCAACCAATGTCAAGACGTTGATGAGTGTGCTGAGAAAAGGATAAATGTGATCCAAATGCTCGA  
TGTACTAATACTGATGGTTCATTTCTGTACCTGTAACCTGGTTATAGAGGAGCTGCTGACTGATGGTACATGTGAACCTGTTGGAATCTGCTGCTGTTT  
GGCCTCCACATGTTATTTCAATGATAATCATTGGCTAAGTTTATGGGTGATTGCTGACTGTTATGTCTAAAGATGGTTGATGGTTCCACCACAACCT  
ACGGGGTATGGACAGCACTGGGATGGAGAGAAGATGTTCAAGGTTATTACCTGGGTTAAGGATGTTACTGTAGTGGTTAATAACAGAAAATCTT  
GTTAGGAAGAAATCGTGAGATAAAGATAGATGGCAGAATTTCTTCTTATAGTATAACGGTATTACTGTGGATGACAATGGAAGAGAAGTGCAGTC  
ACAACAACATTTGGTTTAGAAGTTTATTGGGATGGAGGAGATGAAGTAGAAGTTATATTACCTAAAGAATATAGAAGTAAAACATGTGGTTTATGTGGTAA  
TTATAATGGTGAATAGAGGATGATTGGGTTGTTGGAGATCATTGTCTAAAGAGAAAAGGAAATGTGACTGATAATGAAAACCTCTCGGAAACCTCTGG  
GTTGTATCTGAATATCTTGAAGCTGCAGCGCATGTCAAGCTGATTGTGATGCCACCTACTAATAACTTTATGTAATGAACCAATTAGTCAATTTATT  
GTGATCGAGTATTTAACTGAAATATCCCACTCAAGGACTGTCTAGCCGAATGGATGAAAACCTACTACAAAACCTCAGATATAGTTGTGATTTGATA  
TCTGCCACGTGACACAAGATGTAAGTTGGTATGTGTTCCAGTCCGAGAGAGTTGCTCAATGAATGTGAGAAAACATCAATATTGATGGGCTGTG  
GAGAAAACCTGGATTCTGCGAAATAACATGTAGTAAATGGAATCAGAACTGCGGACCAAGAGGTGAACCTGATAAACAACCAACCAACATGT  
ATGAACGTCGGGTACTAATCCACCTAACCTAGTTTTCTGTGCTGAAGGTTGTTTCTGTATACCGGGTTATGTTCTAGAAGGACAGAAATGATTCTT

CCAACAGACTGTGGATGTGTTATGGATGGTGTCTACATGGCGGTTGGGGATACATATGTTGATCCTGGATGTACTAAGATGCAGGTCTGTTATGAAAAATG  
GAAATTTAACAGACAGTCCCTTCAGTGTGGAGCTTAGGAGAATGCACGCTAGATGATAAGACTGGAATTTATGGCTGCCATTGTAAGGAGGGTTACCTT  
GGTATGGATTGCAATGCTCAGATGATCCATGTTTAAATGTAATAATGCTGATAAAGACTGCAGTGTGAAAAGGTGTTTGTGAGTGAAGATGGGTTATAC  
CGGTGATTGTAATAACTGCGATGATTGACGAATGTGCTACTAAAACTGATAATTGATTGATCTTGGTCCAGAGATGTAAGTAAATATCGGTGGATATGA  
TTGTCTATGTTAGACGGATATGTCAGATACGGAAATTAAGTGCAGTATCAACGAATGTGAAGCTGGGTTGATACATGTGATGAACATGGTGAATGTA  
TCAATACACATGGTAGCTATTTATGTAATGTTGCAAGGTTATACCAAGAATGCTCTAGATACCTGTGCCCTGATGGCACCCTGTTCTGCAACCGGAA  
GTAAATGCTGCTCATGCTCTGGACCAGCTTGTCTAGACCAGGCAAGGTTTGGTGTGACGATGGTAAAACCTATAACAATGAAAGAGCTTTCGAATTGCT  
GCATGTAAAGCAGGAGCTGATGTAGATGTTAGTTACAAAGGAGAATGTAAACCTTCTGTGGTGGAGTTAGTTGTGAGAAACCATTTGAGAAATGTGTTG  
TTGATAACACAATAGGTGTAGCTCAATGTGAATGTCCTAAATGTGGAGGAGGTGATGTCACAGTAAGTGAAGCGCCTGTGTGTAGCAGTGCATTTATCATG  
TTTCCAGTGAATGTAATCAAAACGCATCATGTGGAAGTAAATGCTCCACTAGTCCAGAGTGCATCCAGAGTGCATCCAGGCTTTGTGACAAAGGCCAGGAAG  
TAGCCAGTTGGACCATGGACGAATGGGGTACTGCGAGTGTAGATTGGTGGGGATTATGAATCGAACTAGAGAAGAAATCAGAGCAAGAACTAG  
CTACGAGAAAACTTGACGCCTATCTCAGAAACAGCAGCTTGTATGGAATTTG

>CL3399.Contig1\_L1\_2\_1

TGAAATTCAGAGTGTGTTAGCCTCTGGTACTCCCTCTATAGAACATTTGACGGTGTGTTATTTCAACTACAAGTCAACATGTGAAGTACCTTGGCGAAAA  
CCAACGACTTTACTGTGACGGCATCTACAGACTGCAATGCTGAATCAATCTGCCAGAAGAAAATCAAAATCACCGATGTTGAAATAGTGCTACATTTCTT  
ACGTGGATGGTCAAGTATATTAATCCCGTCAAATGTCCCGTAACACAAGAAGAACCTTATCCGACTCACTTGTCAATGTTGTTGATCTGGTACTCGA  
TTTCACTCAAACATTCATCCGTTTCTACTGGACTTACCGTTGAGTTGACAAAGACGGCGCTGCCTACGTCACTGAGCAGAACAGGTCTTATTGGAAGTG  
GGTGTAACTGGATGTGAGGACTTCGATGGTGATACATCAGACGAGGCTGATCTCCGCTGATGGATTCAAAGCTAAAGCTATGGGAGATTGCGA  
ATTAGTAGCCGGTGGTACATGTGGTCAAGCTTACCAGAAATGTTCCGAACTCAACTATCAGTAGCCGCACAAGAATGTTACACTGAAAGTCTAGCATGTT  
CGCTTCGTGCCACGGAGTTGTCGATGTCAATCCTATTTTGAATGTGCAAAGAAGCTTACTGTGCAGCTGTGTAGCCAGTGAAGGCGTCCAGCAAGAAG  
CTCGTTGTAACAGATTTAAGATGTATGCAACCGAATGTGCTAATAATGAAATGTCATCAGTTGGAGATCACCGCTTGTGTCCGATTGTGTGCCAGCCG  
GTATGGACTACAGTCAATGTGAAGTTCATGTCCCTCGCGGATGTGGAAATTAATTTGCTTCTTGAACAAAGATGAATGTGGTGCATGTGACTGGTTGC  
CAATGTAAGCCTGGTCTGTTACACAATGGCGCATGCGTAACAGCAGATAAATGCTCTTGAATAACAGAAACAAGACTACAATAATAACAAACCGT  
AGTCTCCGAAAACTTGTCAAACATGCATTTGTTGCTTATGATGTAATTTGAAATGCGTAAGCAGACCATGCAGCGCTGAAATGTTGGAGTTG  
GTTCTATGAAGACTTGTGAGCATTATTCATATTTGAGTACTACTGCTACTTCTACTTGTAAATCACCTTGTACAGGAGCCGACTTGAATATGTTGAGTTAG  
ATACAACTAAATGCGTCAGTGAATAAATGCTGCTGTATTAAGGGCGTGAAGTTGTTTATAAAGGTCAAGCTGAGAATTGAAAAATATAGATTCTCA  
ACACGACTCATCACAGCTCAAGTGAACAACACCAATGCCCTTCTGTTGGTAACTTCTACATTAAGAAGGTCAACCACTGTACTACGTTATTGAAGTGC  
CAAATGTTGAGTCTTTTTAGTGTGCTGGTAAACAATACGATTACAACCGCGTATGTAATCAAAGTGTGGTGCATGTGGGAAATTTAATTACC  
AATTCATGACGAATTTGAGTACCTCAGGCGGTGCTGTACATCCAGTGAATTTCTCAAAGCCTATTCTGATGGCAACTGCGCGCTCATTTTATGATATA  
GCACTGCCACCAAGACATCATCTGCTATGTGTAACGAGTTAGATACAATGTTTACTGTGAGCAGATGTAGTAACACCAACCGACAGACCGGTTTCCGGT  
TAAAGGAACTCTGTGAAATATCAGCAGATCCATTAACAGTCTGCAATGCGCTTTTGCCTGTGGAGAGACTGTGGTGTACCAAGGAAACAATTTGAAGCA  
CAACAACTCTGACCGCAAGTGTAGTCAATACTTACTTGCAGAAAGTGATATATTTGAAATGTCATCCGTTGTAAGAACTGTAAGAACTGCGCTGAT  
CCCTTGTCCACAACATGCATGGAACAATGTGACTGTTGTTGATCCGCAAGTGGTATCGGCAAACTGACAGCTTATCTGGAATGAACAGCTGCGCAAC  
ACAAGCTAGTTGACTTGTATGACATTGCCAGCAATGAGGTGACAGCTGCCGGTACATCTACACAAAGAGGCTGCCAGGAATGTACCTGTTCCAACGCAA  
CTTTATCATGCGTGCATCTCAATGTACAGATGTAATATGTTCTTGGTTTGGAAAAAGTAGATGCTACCCCACTGAATGCAGACCAGATGTCCAACA  
AATTTGAAGCTAATTTACATGTGCCAGCAGACATCTCAACATCAAGACGATGCTTTTGTCCGTTGGACAATGGGAAAAATTTGGAAGGAAAAATGTATA  
GCCCTGAAACATGTCCTGTTATCATATGGGTAACCTGGTATGAACATAACAGAGCTATTGATTATAACTGCAAGACACTACAATGTAACAACGGTGTGTTG  
AGTCAGACGGCTGTACAAGAATGTTCACTTGTGGCATCTGGAGATCCCCATTACTCCACTTTTGTGGCAAAACATTTCAAATCAACAGGAGATTGT  
ACTTACAACCTGTTAAAACCTACCAGCAATCACCTGTTCTGTTCAATTTGATATCAAAGTTGAAATGTTGCTGTGGTCCACTGGATGTCTGACTA  
AAGCTATCAACAATTAACGTGAATGACACATTGATTACAATGACAGCTGGTGAAGATATAAAGATTGGAACAACACCATCAACAGCCTGGGATTCCAG  
CAAATTTCTATTACTATCTACAACGCTGGTCTTTCACATTTGTTGATTTGAAAGGTGCTACTGCTATGTGGGACGGAGGAACAGATTGCGCGTAACT  
TGACCAGTGCATGGAAGGTAAGTTAAGGGTCTTTGGTAACTTGTGGTAAATATTGACAATGATTTTACCAGTAACTGGAACGCTTGCAGCAAT  
GAAGTTGAATTTGAAACTCATGGAAGGCCGGAAGTTGTGGAGATGTTACTGAAGCACCACAATACAAGAAGCTGCATGACTGTTGATAACGTACCTA  
GTCCACGAACAACCTGGGCTAAGAACCAATGTGAAGTATTTCTACCGTCTGGTCTTGTGAGAAATGCCGAAATGTCTAAATGATGAAGTCAACAATATT  
ATACCGATTGTTGATGATGCCTGTGGATGTGACCGAGGTGGTGAATGTGAGTGTGTTGTACAGCCATAAGTAACTTTGCTGAAGCCTGTAACCGTGT  
GGTCAACAGCCAGATGGAGACATCAACGCTATGTTCAATTCAGTGTGAGTACGGCAGTGTGACAAACCATGTGGCTCCGATGCCAAAAACATGAT  
GGATCTTACGGTACCAAGTATGGATCGTTCTGTGACAGACAACATGTGTTGAAGTTGTTCTGTCCACCGACTACGTCAAGCAAGTGAAGTGAAG  
TTAAATGATTCCACAACCGAATGCCATGTACATACCAGGAGTTACATATAACAATGGTACGTAATCACACAGGATTGCATGAAATGTACCTGTGTT  
GGTAGTACGTTGAGTGTGATGGAGCAAACGTACCCGTAATGTACAGGAGATGAATCAAGTGTCAACAGGATGGATACTGTGATCCAAAAACCTTCT  
ATGTAATGGTATCCAAAATGTAATGACAGATCAGATGAAGTTGATTGTGCAAGAATGCTCTACCGAGGAATTTGAGTGTACGTCATGGCCAGTGT  
TACCTTAAATAACTTTGTAATGGTATCAGCAATGCGAGGACGGAAGTGAACATAACAATGTGCTCAAACCTGCACCTGTTCCGGTTCGAAATTTACCT  
GTACCAATGGAAAAATGATTCCAAAGGCCTTAAATGTGACGCTGCTAATGATTGTGGCGATTTTTCAGATGAACAAAAATGTCAACAATGTAATGAAGG  
GAAGTTATGTGCTCAGCCACACCTTAAATGTGATTGCAACAGACTTTTATGTGATGGACATGACGACTGTGGGGATGGTACAGACGAAATCGGATGCAC  
AACCAACGGGCATGACAACAACCAAAAGTATGTGACAAGATAAATCTGATCTTCCACACTGATTTATTGTTGGTCCGACGAATCAACAGTACCTCAC  
AGCCCTCCGTCAACCAAGCTCAAACCCAGTGGTCAAACCATCCACCGTTTGAATCCAACCGTGGTGTGACAGCTCAGTCAAGTCAACCTACAGA  
TTGAGCTCGCGTTCACCGGAAACCTCTGGACTGTTACGAAGTTAGAGTATCCATCCGAAATGCTGCTAGTGTGACCATCGAATACACTATCACCGCTG  
GCTCATTTATAAAACCACAATCCCGTGAACCAAAACCTGGAAAAGATTTATAACCACATACAGCACACTAGTGGTATGGATGTTCCAGGATTGTGATCT  
ACATTACACCGAATCGAACGCAACCAAGTATCAGTGTGGGATCTTTCATTGTCGCTGTTATGAAGGACTTACAACCTGCCAACGCAAGCACCCTC  
CAATGGAAACAACAACCTGGCGGTACAGAAACTACAACCTGGTATTACTCCACCGTCTGTTTCAACCGTTTCAACAACGAACCTGTTTCATCAACTCAGTATT  
ACTGTAACAGTGTTCAAATCTGTATTATGATGAATCAAACATGCGATGGTGTATGTGACTGTCAAATTCATCTTCAACTGAATGTGAAGATGAAACATTGC  
CAACTGTGCTACTACCACATCAACTAGTACCGAAGCCACAA

>CL6799.Contig2\_L1\_2\_1

AGGAAAGCGTGCAAGCAGAAAAAGGAGACGAAAGTTTTCACGAGTAAACCGATCACGAGAAAGAAACGGTTCACGAGAGGAAATGGTTCAAGCAGAG  
TTGGTGGTTCTCAAAGCGTAGAAAATAAAGAGAAATATATGGAGATTTCTGACAGGCATGTGTGGAAATATGGGGGATTTAATAGAAAACAATCTAG  
AGTGTACTTGGCATATTTGAGCGGAGAATATATGCCAAGGCATGGAAGAATGAAATGATCGTAATGGTATCACTGATTGTTAGCTATTTATTTTCATC  
AAGCGGTATAACAGGATGAAATGGCATCCTGTAACAGAAAGTACGCATTTATATGTGAAAGAAACGGACAGGTTGATTCCAGTCAAATATATGAAACA  
GAATGGTTAGATAGTGGTAAACCTGAGAATAGAGAGGATGAAATGTTATAACCTTATAACAGAAATTTGCCTTATACAGGAAACGACCATGTTCCAA  
TCCAATAGTATGAAATGAGAATAGTCGGTACAAAGACACTGATTTCTAAAGCAAATGTAATGGTTTTAAGTTGGAGAGGCAAGCATGTGAGAAAT  
GGTCGGTTAGATGTTGGATAGAAAGAAATGGTAAAGAAAGTCCAGACTGATTTGAATATAAATCTACTTGTCCACTGACAATGATTTGCGATTTACC  
CAGAAATCAAGAAAACTGTAGAACAAGAACATGAGATGTATGAATCGAGCTAATGGTGGCTACTGTGTCAATCCATGCAAGAGACTCGACAAGTGC

TGCTTTGATTATTGTGAAAAGGCCGCTTTATGTAATCAAGTGGTGATCCTCATTATAGACATTAGATGGAAAGAAATACAATTTCCAAGGCGATTGTTCA  
TACACATGGTCAATACGTCAGGAATACAAGGTCAAGAAAGCATTTTCAGTTAGAGTTAACCACTATAAGAAAGAAACCTAGTGCCAAAGCTCCTACACC  
GATTGGTGCAACTGACTATATGGGTCAATAATACAGAATGGAAAGGAAAAAGAAAATATATGTTGACAATGAAGAAACTCTTTGCTTTTGAAAATGA  
CCATGTGAAAATAGCTCCTGTGGTGATAGAATCACCATTTGACTGATTTTGGTTTGAATTGTCAACAGATGGCCGCAAAAATTTTTATGTTGAAAGCATC  
ATACAAACTACAAAACAAAGTAGAAGTTTTATGGTAACTTCGATGGAAACCTGAAAATGATTTACAGATGGTTGGAGCACATGCTTATAATAAAAGC  
TTACTCCGGCTGAAAATTTGCCAACAGTTTTGCTGCTGATGATCATGAATGTAGACTACCAGATACAGATACAGAACCTAAATGTTCAAAGGATGATGAAC  
GTAGAATCAAGGAGGATCAAAGGATGGCTGTGGATTACTCAAAAAGTCACTCAACTCTGTTTTATTAAAGCTGCCAATGGAAACCGAGCTCTTTGAAA  
ATGTTGAAAGAGAAATTAACAGTTCGCTTTATGATCTTTGCTTTCTGAAAATACCAGATGTGATTATTACCAAGCTGCAGCAGATGAACCTTAGTAGTATT  
GGCTCAGGAGTACAAACTGGAGAAAGGAACTAACTGTAACCTGGAATGTAATGGTGATTAGTACCAGTATCAAATCCACCCTTAAAGAAGCTACAT  
GCATGGAAACCAATAAACAAGTAAACAGTAAACAGAAAGTCCGTTGAAAGTGTCCGATGATAAAAATAAAAGTATCGATGATAAATGTGTTGATGT  
ATCTGAGTGTATGGGTTGTGAATCCGTAGGCAATTCATCCGGTTGGTCTGCTCCTGATCCATTATCAGATTGTAAGATGACATATCAGTCTCGAGTTACAAA  
AGATGGTAGTTCAACAAGTTAATGTTTGAACCAAGAACATGTGGAGAAAATACTAAGTGTGAAGGCGGTAAGTGTGTTGTATAGCAGGCTTTGTAATGA  
AAAATGAAAAATGTGAAGAAGATCATAGTTCTAATAATGTCTCATAGCTTTTTAAAGAAAGGACGCAATGTTACAAACTTTTGCACAGAAAAGCAAA  
TGGCATGAGGCTGCGGTGGCTGTGCTGGACAATAGATGGCGTGCATTGGCTAGATATGATACAGATGAAGATAAAACCTTCTAACTGAACTAGCTT  
CTAGAATGTAGGATCTTAAAGAGCTAAAGAATTAAAGGATGCAATCTAAGAAAAGAGGAAAGCTCGAGGTGTTCCAGTAGCTATGTTTTCTGGATGAG  
TGTAATACAAATAGATTAGATCCAAGTTAATCCAATCCATACTCAAACTAGATGTGCCACAATATCTTGTAGTATCTAATCGAGTTGGTTGTGT  
ATATGGTGAATTTAAAGTCAAGGAAAGGGGCGAAGGCCAGCAAGAGATACAATAAAAACCTTTAAGATAAGATCAAAGAGACGATCAAGGAGAAAACA  
GAAACAAGGCACGATCAAGGAGAAAACAGAAACAAGGCACGCAGATCAAGGAGAAAACAGAAAACAGGCACGCAGATCAAGGAGAAAACAGAAAACA  
GGCACGCAGATCAAGGAGAAAACAGAAAACAAG

>Unigene33579\_L1\_2\_1

CCGAAAGGAACGTAGTTGAGATTATAATAGACCCAACCGCACCTCTACTACAAAGAAATATCACACGCTCGTGTGACTATAAATCCACGAATTTATATAA  
CAATCCCGAAAAATATTGACTGCTCAGTCTGTGGTAAACAATTTTATTGAATTGTAAATTGAAGATTTATAAGCAGTAAATGATTGTCATTGACAGAAG  
TGACACGCTTTATTGTGTAATAATTTATAAAGTTGTGCGATTTGAGCGATTTGGTCTATTGGCACGGGCCACCCGTTCAACAACCTACAGAAATGGCGAGTAA  
TTGGAAAGTTTTCTTCAATCTAGCCTCTGCGTAAGCTATTGTCTATGTGCGAAGCAGGGAACATATATGGTGTCTTTTAACTAACTATTGCCCCATGT  
GTTGATTATACCTTCAAGCAGCAAGTTCTAGGAAGTCAAGTATCAACTTCAACCTTACACTACATATAGTGAATGAGCAGGACGTTTCCGACATCGCGCC  
AACATTGATACGTACAACCGAAGCTAATCTGAAGATTCGCTGCGATTTAGTACAATCATTTTACAGCATTAAAGTTGTGGAACTGGTGGCGTAGAATT  
TGAAAAGACGAATTATGTTACCTTAAATAGCAATAATTTGGAGATTGAATACAAACAGATAAAAAGGTTTATAAACCTGGGCAAAATAGTGAATACCGTA  
TTTTTGGTGAAGCCCAACCTTACCCTGAACGGGGCAGTTTTGAAGTAAACAGTTACGGATCCACGACGAAATAAGATTCAATATTACAACAAAGAAGGG  
GATGGTTATGGTGTGCGAACATTTCCCTCAACTATCAAGTGAACCCATCTCGAACCTGGTCTATTAGCGCAGTTGTCAGTGGTACCAACACACAGTA  
ACCTTACCATTGAAAAATACGTTTTACTAAGGCTGAAGCCAAAGTTTCACTTCCCTCATTGTTGCTGAAAAAGATGAAGAAGTCAATGTTAAAGTTTCAT  
CAATGTACACATTCGAAAGCCTGTGAGAGGATCTGTAGTATTGCGAGTAAACCGTGACTATTACAATAACAAGAAAATGTACGAAATCCAGAAACAGG  
AAAATATGAAGTCAGATCATCAACCACTGAACTTATGTATGTTGACGCTGAATGATAATGGTGTGCTGATGCTGATGTTCAACTTTAAAGAAATTTG  
CGACTATCGCTAGTACAACAGTATATCTATAAAAATTTAGTACTCAAGCCAATGTTACAGATAGTGAACAGGAATTTGTAATGCTCAAAGCTTTCCA  
AAACATCCGTGAAGAACACCCGAGAAAAAATAGCTTTGCTGTAATCCAACAACTACAACTGGTCTGACAAATCATCTTTTATCGACTTGAAACAAC  
AAGATGATCGACCAGTCTCAACCTAAAATTTAAGGTTACTGGAACAGTCCAATTTGAAGTCCCTAAAACCGACTACAACCTACCCTACCCTACGTA  
CAACTACTACTCGAGCCAAACGGAGCATTAGTGAAGAGCCTATGCTAGTGAAGAAGTATTGCTCGTCCATACTATCTATTGCGGAGGTCCAAGTT  
ATGAATATCGCAATCTTGAAGAACAGATACTGGAAGTGCCAAGTAATGGATTGGTCCGATGATCTGCTGGTTACTGATTTAAATGCTTTGACCGTCTCAT  
TAACGGCGACATATACCGGTGATACCAAGTTACCAGAACCCAAAGTTTATCTGTAACAAGATCACCCAGCAAAAACCTTTATACAGTGCAGCTGAGAAT  
CTAAACCAAAAATTAATCCAACATATTTTTGATATAAAAATCCACTGCTTCTGTTTTAAAAGTTTACTATACGATCCTATCGAGGGGTGTGGTGGTATTTAA  
TAGGTACCGGCTCCTACAGATCAGCCAGTAAAGAACAAAGAAATTAAGATTTGCTGTACGATACAATATGGCACCAAAATTAAGAAATTTGCTTCTTAG  
GTGAAAATGATGAAATCGTCGCTGATGCTATATCATTTAACGTGGATGGACTCTCAGAAAATAGGTTTCTTGAAGTTTCAATAAGACAAAGTAGAGACC  
GGTGAAGAGGTAACCTTGGAGTCAATGCTTATAGATATCACAAGTATATGCTCTGGCTGTTGATAAAAAGTACAACCTGCTGGGAGCGCCTGCTGAAGA  
TCATATTTCAATGTTCAAGATTTCTGAATCACTGGATACAGGATATACACCATAATTACGGTGGTGGTGGAGGTGGTTTTGAAAGACCCATGATAGC  
GTTACAGAAAGAACGAGCAGCTGAACCTAGGAAGAAGAGGCAAGCCGAACTATTGAGTCTCATCGCCGACTATCAATATACTGGCCATATCCTTACTTTA  
CATCTGGTGTGATGCCGAGGATATGTTAGGAATACGGGAGTTTACGTAGTAACCGATGCTTTCAATTAACAATATGTAGCACCTAGATCTACTGTTTAT  
ATCCAGCTATTACTCAGAGCGGTGAGCCACCGATGGCAGAAATGAAAATGAAAAGTGTCTGACAGGCTCCACCGCTTGCAGTAGAAAACATTAGATGT  
TGATACACCTGTGCGACTTTTTCCGAAACATGGATCTGGGATCACAATAAGTCTGGTGTAGCTGAGTAAATTTACAGTAACTGACCTGACAGCATTAGAC  
AATAACAACATGGACTGCCAGCGCATTGCTATAAGTAGATATCCAGTATTGGTGTGGGATTAACCTGACATAGCGTGCATTACAGTTCTTAGACAATT  
CTTTGCTAGTTTAAATCTTCCATATTCTGTTATCCGAGGTGAGGAAGTGAAGTCCAGGTGACAATATTCAACTACCTTGGAGATGACACTGAGGCTCAAGT  
TGTCTTAGAAAAAGCTCTGGTTATATAGTTCTAGAAGTGGACAGTGGGGTTCCAGTATGAAACACAAAACGCTAAAATCAAACATAAAGGTAGCTG  
CTGATGGAAGTGCCTGCTCACTTCAACAATAGGTGTACCAAGTTGGAACAATAAACATTAAGTTGCTGCCAAAGCTCTGGTAACCAAGCCGGTGAT  
AGGGTTTCCAGACAATTTTGGTGCAGCCGAGGGTATACAGCTGAATATAATGCAAGTGGTTTATGCTGACTTAGAAGAGAAGAACCCGTTTGAAGCAA  
GCATTCCTATTACTTTCCACCAATGTGGTTCTGACTCTCATAGAAATTATCATTACCCTTTCCGAGACCCACTTGGCTCTGCCCTCAATAATCTTGAAAAC  
TTGATCGGAATGCCTAGTGGTTGTGGTGAACAAAATATGTTGCGATTGCTGCTCAATATTTATGTTGCAATTTATCTGGATGCCACAGGTGAGTGAACCC  
GCCCTGAAAACCAAAAATATCCGGTTATTTAGAATCAGGTTATACCAATCAGTTGAGGTATATGAGATTGGATTTCTCTTTAGCTTTTGGAGACAGAC  
AGCTCTGGTAGTCAATGGTTAACCGCTATGACTGAGAACATTTGCTGAAGCCAGTGAATATGTATATATTGACGAGAATATATTAGGTAGAGCAGCAG  
TTACTTGATCAGTAATCAACAAGAAGATGGTTCCTTTATAGAACCCGGTCTGTTATACATAAAGAATTAAGGGGAAGTTCTTCCAAGGAGTAGGTTTGA  
CAGCTTTCTCTTACTAGCTCTGTTGGAAGTGAAGACAAAAGTTCCATTAGAACAACATTTGACTTACTATCAGTTATTTGGTACAGCCTCTGCTACAAT  
GACTAATGCTTACGAACTAGCCATCACTGCTTATGCTTTATCAAAGCCAAAAGTCTTCTGCTGACGCTGTTATAAGTAAATTAAGAAGTGCACAAGTAAAC  
CAAAGACGGTACGCTGACTGGAATGTTGCTGGACGAAGATCGTGTGAACATTTCTGGAAACCCAAAGGAAACAGAGCAGTGCCTGGAATATTGAA  
GCTACAGCTTATGCTCTGTAGTCTATGGACTAAAAAAGATACACTCAAAGTCTTCCAGTTATGTCATGGCTCATTTCGCAACAGAAATGGTAAATGGTGGGA  
TACTCTTCTCAGGATACTGTTGAGCCCTGTGGGCCATGTCTCAGTTTCCCAGCTCATCTACGCTGATACATGGGATGTGAATC

>Cl6346.Contig2\_L1\_2\_1

GAAACCATGTCGAAAATCCAGATGAACCTTTCTCGGCAATGCAGGGATCGAACCCCGACCTCCAGGCTAGCGAGCCAGCGTCTTAAACCCTAACCCG  
GTGTAGGAAAGGCTTACAATAGTATCAAAAATATTATGCTCATTGATATCGAAACGTCGTAATTTATAAAAATAAAACAGTATTGTTTTCCATAAAAATTTGT  
GTTCTGTTAATGTTAGCCGAGGTCATATATATCGAGGCCCTGTTTCAGTTTTCCAAGTCTATAGGTAATCCGGCATTATAAACTGTTGTAGCATCGCA  
GTTTGTGCTCCATCAAAGGTTTTACTAAGCGTGCAGGACGTAAGTTTAAAGGATATCCGGAGTTAACTCATGCTCCCTCGCATGTTTCTGTTGATTATACCT  
GTACCAAAATCCCTCAGTATATGGAGTTACCTGAGCTTGGTCCAAAATATCTAATGTCGACCTACCTGATCATTACATTTACATCCCAAGATGATA  
TTTCTGGTATTGTACATCTCTGTTGTACTCCACAGTTAAACGTTATGTCTCGAAGCAGTGTATGTTCCAGTGCAGCATTGATGTTCCAGTCTGGTATGTTA  
CCAGAGGCGAAGTCCGGTATGAAAGAATTTGGTCCGCTTACCCTCGCAATAAATTTGATGATGTTTGTGTTGAAACACAGTTTTGCAAGCAGCTTCC

ACCGGAGAAGACTGCCATTGAACAAGTCTTTGGTTTACAAAACAGTTCCACAACATGGGTGCGGTACGAGGCTATGGGTGGTCAGATTACAAGTGCTGATA  
TCGTCGCATGCTTTGGATAGTCTATGATCTTTCCGTCCAAACATTTGGTGACTTGTCAACCATCGGCGTCTTCCATGTTTCAATTAACATGATGACACC  
ATTGAAAACACATTTTCCACATTTCAACAGTTCAACACATGATCCATCCAAACCGTGTAGCCGTCAGCACATACATGATAAATCTGGTGTCTCTCG  
CAGTTATCTGGTGGTGTATCCATTCCACATGTGTATTCACAAGCAGTGAAGTTGCTGGGTTTCTCATTAGTTCCGGTACAATTGACGTCCTGTAAGAAACAC  
GGCTCGGTCTCTGAGGCGGGTGTAGATTGGACACATTCGGCACGAACAGTTCTTGTTCGAGTGTGTGTTCCCATCCGCACTTCTTGGTACTGTTTGGCG  
TTGAGAGAACATTGAGACCATGGTCCCCATTCTGACCGTTAACACATAGACATGGTTCGTTATTACATTGTTCTACTACTGGGTCAATGCTGAGACAAACA  
TTAGCTTCTTTGGTTGACCAAGATCTGGGTGCTGATCGTGTCTACTGTTCCATTGCTTGGCAGTTCCTGGCTACAAGGTGTGTAATCGCCAAAGATG  
AAATCACAGCATGGATCTGGACCACATAATTCTGTTTCTGTGCGTCACCAACACATGTAGCTCCGTTACATTAGCCTCGGGTATCCACAGATTCCGGTAT  
CTGGTCTTGTGTAATTTCTGCAGTCTTCGAGCAATTAATCCATTGTGTCATGTTGACCATGTTCCATCAACATCTTGTACAGCATCTGGACCACAATCAA  
GGGTTCCATTCTTACATCTGCATTTGTGCGATTTTCAGAAACAGATTGACCATTTTGAAGTTCAGTACCATTTCGAGAACACATGGGCATGGGCTCTGAC  
AGGTTTCAGTCTCAACATCTGTTGGTTGGGACATGTTGGGCTGTAGAAAGTTCTGAAACGTGATCGTACACCTTCTGGCCACAGAACAGTTGCTGACA  
CAGTCTGACCATACTGACCATTGCGCGTATACACAACAATCTGGATTGGTGTACATACGTATCCGTTGAGCATATCACATTTGCATTCTTACATGTTTGTG  
TGTTATTAGTTGAAAATCCGACTGGGATTCTGTTACCATCACTGTCGAAACATGGACATTCTTCTTCCAGACACATTTGGTGTATGTGAATCTATTTTCT  
TCACATCTACATGCTGGTAAGCATGTTTCATTGTTGTATACTTCTTGGTGTGATCCTAGTCGCATATCTACATGATTGTACACTGGTAATGAACAATT  
ACTGTTGTAGAATTGGTTCGTTTACATATGGGTGTTGATGGACAGGAACTGCACAGTCTCGGCTTCAGATTGAAGGGCTTCGGAACATACACAGCCAG  
CAGTATTACTACATGCTCTGCTTCTGTTTGTGAGTCTGTAGGACAGGCTGAAGTTGGGCGATTTGAAAATCACTCCATGTAATCCAGCATTCCGGGTG  
TTGGTGTGAACATGGTGTTCATTACATGGCTGACTTCTGGTGAACAGTTCGATGAGTACCAGCGGGTGTGCATACGTTACGTTCCGGTCTTCTTC  
CGCTCCACAGTCTTTGAAACAGTCACTCCATGGTCCCATTTGACATTCGAAATCCATGACAGTACATTTTAGTTGCGCTTACATTCAGAACTGACGTT  
AAGGCACTGACCAACGACAGTAACTCCTGATGCCAACATCTGTCATTTCCAATCGTACTAAAAGTTTCTGTTTCTTACAACCTGACCTTATGCTGTTGACC  
AAATAACCCAACTCGTTGTTAGCCGCGCAGGAAGGTGAGTTCAGCAATAATACAGTTCGTTCAAACACTATTGACAGCTATTACATGCTTCGGTTTCGACA  
TCGGGAGTGTCTTATCTCCACAACATGTGGCACAATTCCTGTTGCTGATCGTGTACCGTTCATGCATGGTGTACATGGTCCCCATTCTCCATGTCGGA  
ATTCCCTTACACAGCCTGTGGGTGATGATGGCGTTCCTGTGTTGCTGGTAATGTAGGTGAAGTAACTGCTGGTGGTCTGTAGGTGAGGTTCTCTGCTGTA  
CCAGCTGTTTCTCGAAGCAGGCTCTGACATCAATCTGAAAACAGTAGGTTGGTCTACAGATGTTGGTGTACTTCGATTCTGATATTTTCCGCTACTGTT  
CAGCTGGGAATGAGGCTTTAAGGCTAGGTAATGATAAATCAGCTGGGTTCAAGTACGTAGTCTGTTTCTGAACCGCCAGTTGGAGTTACAATACTCTA  
ATAGATTGAACATTATCGGCGATACAGCTGCAGTATTAAAGTTCTACCTTCTATTGTGACATGTTGACATGTTGACATGTTGACATGTTGACATGTTGAC  
CAGGAAAGTAGCTGGTCTGACTGCTGGTGCAGGTTTTCTACATCACTGCTGGCAGTGTGAATACTTGAAGCAGGGATAATGACAGGATTATCC  
ATTCCATTACTTACGACAGACAACCTGAGGTGAGGTTCTGCTGTTCCAGTGTACTACGAAGCAGCGTGTACACTAACA TCAATATTAATTGGTTG  
GTAATGTTTGGGTTATCTCTACCAAAATATCTGTGACAACACTTCCGGTGGGAATGTAAGAATACCGTCTGAAGGATCATCATCAGTAGATTCAAGT  
AGGGTCCATGGTGTGAAGGTCCTGTCCAAATACTCTAAATGCTTGGACATTTCCCTGACTGGAAGATTTACTTCTGACAGATCAACGGGTTACCA  
TCAGTAATTTTCAATGTGACGTTGGTAGCCGTGTCCGATGGGTTAATTGTAATGGATCATCGCCTGGTCTCAGATCTGCTGGGTTATCTGTCGATGGGAA  
GGCAGGTTCTGTTCAAGGTAAGTATCAGGTATAACTGTTGGGTTCCCATCTCTGTTACAACACATCGTGGTGTAGTTGATCCCAAGGTTGGTGTG  
CCCAATGGCACTGTAGGTGATGTTCCAATTGCTACTGTAGGTGATACCGGATCCGCTGTTTCTTCAAAGCAGCTGTGACATCAATCTTAAAAGG  
AGGCTGGCTGAAGAGTTGGTGTACTTCTGATTCTGATTTTTTCCGCTACTGTTCCAGCGGAATGAAGCTTAAAGGATAGGTAACGATAAATCAGCTG  
GGTTCAAGTATGCAGTCTGTTTCTGAACCGTCAAGTTCGCAATTAACAATACTCTAATAGATTCAACATTCGTTGGTGTATACAAGCTGCACTGATTTAAGTTC  
TACCTTCTATTGTGACTGGTGTCAAATCAATTGTTACATCTGGTGTACTTCCAGCAGGGAAGGTTGGTCTGACTTGTGTTGTTGTTCTAGGTTTCTACA  
TCAGTTGCTGCTGGCAGATTGTAATACTTGAAGCAGGGATAATAGCAGGATTATCCATTCCATTTACTTACGACAGACAACCTGTAGGTGAGGTTCTGCT  
GTTCCAGTGTACTACGAAGCAAGCGTGTACACTAACATCAATGTCAACTGGTTGGTAGTGTCTGTGGGTTTTATCTTACAAAAATATCTGTGACAACT  
ACTTCCGGTGGGAATGTAAGAATAACCGTCTGAAGGATCATCATCAGTGTGATGTAAGTAGGGTCCAAGGTGCTGAAGGTCCTGACGTTCAAATACTCTAAA  
TGTGTCGACATTTCTTCTGACTGGAAGTTACTTCTGACAGTCAACCGGTTCCACATGTAATTTCAATGTGATGTTGGTAGGCTGTCCGATGGGTT  
AATTGTAATGGATCATCGCTGAGTCTCAGATCTGCTGGTTATCCGTCGATGGAGCCAGGTTCTTGTTCAGGTAAGTATCAGGTGATCAGGTACTGTTGGGC  
TTCCATTCTTCTGTTACAACACATCGTGGTGTAGTTGATCCCAAGGTTGGTGTGTTCCCAATTGCCACTGTAGGTGATGTTCCAATTGTACTGTAGGTGA  
TGTACCGAGTCCGGCTGTTTCTCAAAGCAGCTCTGACATCAATCTTAAAAGAAGTAGGCTGGCCTGAAGAGGTTGGTGTACTTCTGATTCTGATTTTTTC  
GGCTACTGTTCCAGCAGGGAATGAAGCTTTAGGGATAGGTAACGATAAATCAGCTGGGTTCAAGTATGCAGCTTCTGTTTCTGAACCGTCAAGTTCGCAATTA  
CAAATACTCTAATAGATTCAACATTCGTGGTGTATACAAGCTGCACTGATTTAAGTTCTACCTTCTATTGTGACTGGTGTCAAATCAATTGTTACATCTGG  
TGACTTCCAGCAGGGAAGGTGGCTGGGTTCTGACTTGTGGTCTCAGGTTTTCTACATCAGTTGCTGGCACAGTTGTAATACTTGAAGCAGGGATAATAG  
CGGATTGCTCATACATTTACTTACGACAGGCAACTGTAGTTGACACAATAAGGATGCTGTTGGTGGAGCTAATGATAGTGTGATGCTGTTGATGGCTGT  
GTTGTTCTTCTCGTTCGATGAGTGAAGTGAAGATAAATTTGACTAGGTTGGGTTGCTTAGGAGAAGTTATTTTTCCGTTGGGATGTTGG  
GGCTGTGGGAGAAGTCCGGGCACAGTTGGTGAAGTTCGGGTTCCAGTTGGGGAAGTTCTGGTGTGTTGGGAGATGTTCTGCTGTGGCAGTCTCTTCA  
AAACATGCTCTTACATCCAAATTAATTTAACAGCAGCTGAAGTGTGGTGGCACAATAGTAACTCGTATCTTTGAGCTTTGGTTTCTGGAGGGAAATCA  
GCTTTTGGTATCGGTCCTGGAGACCAGCTTGTCTGTTACAGGAGTTTCAATGCCCTGTGAATCAATCAGCACTATTTCTATGGATTGAAATTTCTCAGCAT  
TCGGGAATGTGATGGATCCAGATCGACATCTCATCGGTTAGGTGAAAGATCTATGGTAAATAGTATAGGATTGCTGCCGTTGGGTATGATAGATAAT  
GGGACATCGCTTGTCTTAGATTACACTGGTGTGCAAAACCTCAACACTTGAACCTGGTATAAATGCTGGTTTCTCCATTCCATTTATCTCCTCGCA  
TCTCTGTGGGCGAAGTTCGGGTGCGAGTGGGCGAAGTTCAGGAGCTGTGGGAGAAGTTCGGGCACAGTTGGCGAAGTTCGGGTGCGAGTTGGTGA  
TGTTCTGGTGTGTTGGCGATGTTCTGGTGTACCAGTTGTCACTACGAAGCAAGCGTGTACACTAACATCAATTAATTGGTTCCGTAATGTTTGTGGG  
TGTTATCTACCAAAATATCTGTGACAACTACTTCCGGTGGGAATGTAAGAATAACCGTCTGAAGGATCATCATCACT

>Unigene11734\_L1\_2\_1

GTAACGTAACATTTATTTCCAATTAGAAGTGAACGTACGTACAAAATCTATGCAAAAACATTTTGAATATAATTAACCGTACACTGGTATTCTCTTGTCCG  
TAGACATTACTTTACGCTGTAGCTCATTCCAAAAAATAAAGAAAATAGTATTTAAAAACAAAAAATAAAGTAGATATGGCCATTTCTGTTGATGAATCA  
GATGATAGGATTTGGTGGATGCTTTCTAGTCACATGTGGTAACGATAATATATCTGATCCAACTCGGAAATATCTAAATCTGGACCACGGCCACTTGG  
AGGCACACTGTGATCTACAATGGTTGATTGAAGGGTTTGTGACTGTATTATCAATGACTGTACCAACAGTTTGTGACGCTTTATTAAGAAGAAT  
CTACCTCGCCAGTCACTTGGGATTGACTGACAAATCAGTAGTATTCTGTCAAAGTTGAATCAAAGTGTGCTGCTGAGGTTGATGTTGCTGGGCA  
GCTCTGGTGAATTTCAATGATTAGCCAATTCGCCAGTCTCCATTGGTGTACTGCTTCTTCTGCTGCGCGAATGGGGGTGCTATAATCTACCTTGTAG  
GACACTTTGATTTTCAATTTCCATGAACTCCAGTTAGACAAGCGAAGGATCCTGATAGATGTGCTTCCATTAATAAGGCTGTACCGGCGGGGCTGTC  
GATAACAGCGCCATAGTTGTACTACTCTCCGGCCTCAGCGGTTTCAAAGTGTGATATAAACCAGCGGTTACATGGAACAGAACTGGACCACATGATGGAG  
CAAGTATGAAACACGCACATGTAGATACATTAAGCCAGCCCTTGGACACAATCTGTGTGATTTGTATGCCGTCACCATTTGGCCAAACACACATACGT  
TGTTTGGGCTTTCGATTAAGTGCACCAACTGTTGTGGTGCATACAATTTGGTCTGCCTCACAGGTTGAGTGTGATGAAACGAAATCCATCGT  
TACAGGCAGCTTTTGTGAGTTTCCGCTTCAATTCGTAATATTCGTTACATTTTCACTGACCTTGAACCGATATCCATCTGATTACCTAAACACCGAGTA  
TCAATACACTGCACTAGGTTATATGGTTGCAGTGTGATCTTGTATCCAGTAAAGTACCAACCCACATCGATGTAAGGTACCCACAGCGTCAACATTT  
TGTTATATTGACACTGAAGGTAAGTGTCACTCCGGATTCTCTGGGACCAGTATCCAATACCATTCTTAAACACACAACCAAAACAAGGCCAGGTTGA

TTAACTACAACCACAGTTTGACCCAGGGTGAGTGAGATGACAGAAGCCAAGGCCACAAACGAAACCAAAAATTTGCCATGATAACACTGTCTGAGG  
TACAGATCTGACCGTTCCCCTAACTCAACCCGACTGGTCAGATCTGTACCTCAGACAG  
>Unigene36817\_L1\_2\_1  
GGGAGCCACACCTGTGTAAAACTGGATCAAGACATCCCACAGCAATTCAATAACGGAGCCATTAAAAACCGATACGATTGATTATGGCTATATAA  
ATTCAAATGATGTTTAGGACTGTGCACAATTCTACGGCGCATATTACGGTGAACAGTGTCTGTGCTAGAATTATGTATCGGATACTTGTCTCTATTGTG  
CGTTACTGTCTGCTTTACGACATCTTTAAAGGAAAACTCTGCATCAACCGGGAGATGCTATAAATGTGATAGTAACCGGTGCAAGCCTCTTCAAGATGG  
AGGGAGAGAAAAGAGGGAAGCGGGGGAAATGCCATTAATAAGAGGTGGGAATCTCCTCGAGGTATGCAGTCTCCAAGCTTCTCTCAAACGTAGTCC  
ATTGGTAGATGCTTACGTTATCGACAACGGACAAAAGACCCAAAGTAACTCGATATTGGACACCCAGGCTGTGTATGAAGACCCGAGAGAAAAGAGCTGCG  
TTTATTATTAGACGTTCCGGCAGCAAACGATTATCATTGGAGGGAACTTAATCATGGTGGACAAATGATTAATATGGCGCCAGCTAGTCGTAATAACG  
ACACACTTCTGGTAAAAATGCATGAAGTTATCTCCTCGATCGCTTGCATTAACACCCGATTTCTCATAGAGAGTTAAAAGACAGATAAAGAGGG  
GTGTTACATTTTCAACTATTATATCGAAATAACCTTCTTGGGGTCAAAATACCTGCTGAGATGATGCTAATGCAAGTATTAGCTGAATATGAACAGACGCTGGCGACAC  
AAGCTATGATCCTTATTACACCTTTACAAGAACACAGATACAATGCAGATTTGAGTCTCTCAAAGCCAGGACCTTGTACTTCCGAATAAATATAGTTGTTAC  
TGAGTTGATCATTATTATGGATCGCACACATTGTACCTTTACAGAGACGATTAATAACTACTAAAGGCCAGGTTGATGCGGACACATCTTAACTAAATGTTT  
TGATTGGCTTGGATATCCAGTCCGTAATTATACCTTACAGACCTACCGATCACTATATGTTCTTCACTGGGTACGACTTACTGTAATGGAGATGTACGTTG  
ATAGGTCAATCTTATTTCAAAGTTTTGTGTCAAGTAAACAAAGCCGAATATCAAACTGTATCCATCGTTGAGAATCACATATCAGCTTATATTAAGTGGACATG  
CTGCTGCTCAGCAAATGGTTATATCATTGGTGCAAAGTATGACGGAGAAGCTGGTGAACCTTGTACTAATGAAAATTACGTATGACTCGCTATATGGAA  
ATCCAATGCAAACCAATTAGATGCTCAAAGAAGTTACGGATTTTCTGCTGTTCCATTAACGCAATGAAAAGATTCTGTTCCGGAAGTCTATATTTGTG  
ACTCGAGAAAACAGATACAGCGGTGACATCGTTTTTGGGGTCAAAATACCTGCTGATGCTAATGCTGATGCCGATGCACAGTCCGTTTTGGAATTTGGCGAATT  
GTCTTATTTCTGTAGGGGATCCTACATGAATGAATGAACCTCGATAAGATGTGTTATCAAGGGTATTGTTATAATCCCGTCATATACGCTGCACTGCCATT  
GTCTTCACTGAATCACTACATGTGGTAACAGAAAAGTGGTGTAAAAGGCAAGTGTATTAGCAACCCATCAGCACCAACAACCCAGCTGTGATTTGCCA  
CAAGGAAAACAACACCGGTGAAACGTGTAGTCTCAAAGTTGTGGAACATATCCACTAAATCGTGTGATGGATTGCTGTGCAACATGAAGGATACACCAC  
GAATAAACCAACAACCATATCAACCACATCAACCCATTTTACATAGTACATCCGAGGTTTCTGTCGCAAGTATATCCGACTTACGTCGTTGAGTGCGT  
CACCGTCTATTTCCCTGCCGATAGTCCAACACCATCAACCACTACAAGTCTACAACATCACCTACTACAAGTCTACAACATCACCTACTACAAATCCTAC  
AACATCACCTACTACAAGTCTACAACATCACCTACTACAAGTCTACAACATCACCC  
>CL4170.Contig1\_L1\_2\_1  
TTAAGCAGTATTTTATTCAAGAGAAGATTAGTATATTGATTATTTTAAAAACATAAGTGAATAGGAAGGATGCAGTAATTAACAAAAATGCTTACATAAAG  
CTGTTTCTATAATTATGATCTTGAACATATTATAGCAGATCATGACGCATGCTGGCATTACACAATGATTTCTGAGTTACATTCCTGATTGTTTTCAAATT  
TCAGTGACCTCACTACAGACCCGGGACTGTACAGCGCACTGGACATTTCCGGCTAGCCCCGGATCCATTACCTATTTGAAATGTTGCTTTGTTGTGATT  
TCTGCGTGTGATCTGTCTGTAAATTTGTGTTGTGTAATATATGTGTGGTGCAGTCCCTGCACTTTCTAATTAATATATATATATATATATACAGAC  
TGAGAAAGATATGATCTGTAAAATACTGTGTGATTTAACTAAAGGTATGGATAAAATATGTAATCAAAGCTGGAAGCAGGGAAGACGAAAATGATT  
ATTTGATAAATCAATATGATCATATCATTCTGGTCCCACTTTAAATTAACCTGCTCCGCTCAGTTTAAAGACACATATTTGAGATTAGATAACAAG  
TTGGCCACTTCACTAATAATGCTCAAAAACCAACAGATGTAAGGCAACATGCTGAAAACACATCAAAATTAAGACCCGAGAAAGCAGGATGAAATTT  
TCGCGCAGTCTGATCATCACTAACAGTACGACAAAACAGCATGCTCGATTCCATTTAATCGTTAAATCGTGAAGGAAAGTATGCATAATCCA  
CCAAAGATCGCAGGCCAGCGTGGCATTCCAGAGTTGATTATGGTCTGGATAAGTAAATGTATGCTAATTAATAAATTTAGATAACATTTAGGCCTAAAGAA  
AGACCTACAATAGACAGATTTAGCCCTTGCATGATGATGTTAATCTAGAATTGATTAATAAGAACACGTCGCCAGAAAACCTGTAGTCACTTGGCCTAGA  
CAGTTGTCCCGTAAGCATACAGAAAATGTAGGATTTCCATGCTCTGCTTGTGTTAATGCATGCTACGTCATCTGTTAGGTTGCATCTTAAAAA  
CGGAACAACGTTTATTGACGCCATTTTTGTCTCCCACTTGCATTATCAAACTCAGTAATCGTTGATCTGGAATAATCCATGGTCTCTGGAATTGTGAGA  
ATTTGGAGGACTTTGAGCAGCCGATTAAGTGTGATGTTGCTACTGAGCCATACATAACCAATGATGCACATCGCTTACGGCAGCCGACTCTCAACACT  
CTTAGCTAATCACTACACTTGAATACTTGTCTCTACTGACGAAAAGTAAACAGGGCAACCAAGCAACGTAAGCTAACATGTTGAAGTAAAACCTT  
CGTTTTAATAGATAAGTTTTAGTAACTGTGAGCCCTATTTAATCTGCATTTGAGGATTTAAGATCGCAAAAACATAAAAACCTGTTGCTATTATTAAT  
AAACAGCCTGTGTTACGGTACATATGAGATGTTGCCGGATTTAAATTTGATACAAGTTCATATTCTTTTTAAATTTGCTATTCTTAAGAATTCCTTTGTG  
CGTTGGGAAATAACAAGAACTAATTTGACAGTTATGGAGTGCAGGACACGACACCACGACAAATAAACACGATTTTACGACAGCATTAAATGTCATGAT  
GACGTGTTATATCGGGTTATG  
>CL5700.Contig1\_L1\_2\_1  
CAATCAATGGGGAACAGTTTGTGATGATCATTGGGACAATAAAGACGCGTTGGTTGTTGTAGAGAGCTTGGATTCCCTCGTTAAGTGCTATTGCAAGGA  
GTAGTGCACATTTTGAAGAGAACTGGAATATTCTAGATAATGTTAAGTCTGGAAGCGAATTATCAATACGATATTGTAACCATGCTGGATGG  
AGCACTCAAACTGGACATAATGAAGATCGCTGTGTTACTGTAGCCGTGTACGTTAGTTAAGCAGGCTTTGGACCATCGAGGGTGAATGAAATATA  
TTACAATAATCGGTGGGAACTGTTTGTGATGATAATTGGGACAACAAAGACGCGTCAAGTATTTGTCGAGAGGTTGGATTGCTTTCGACAGGCGCCATT  
GCTAGAGGAAGTGCATATTTTGGACGAGGAACTGGAATATTTTACTTGTGATGATGTTAAGTGTGCTGGAAGCGAATCATCTATACGATATTGTAATCATGA  
TGGATGGAACATACATAACTGTGGCAGCGTGAAGATGCATCTGTTACTTGTAGCCATGTACGATTAGTAGGAGGCTCAGGGCCATATGAAGGAAGAGT  
GGAGGTATATTATAACCGACGATGGGGAACAGTTTGTGATGATAGTTGGGACAATAAAGATGCATCAGTTGTTGTAGAGAGCTTGGATTCCCTCGGGA  
GGTGCCATTGCTAGAGGAAGTCTAATTTGGACAAGAACTGGAATATTCATCTTGTGATGATGTTAAATGTAGTGAAGAGAATCATCTTAAAGATATTG  
TAATCATACAGGATGGAATAGACATAACTGTGGACATTATGAAGATGCGTCAGTTATTTGTAGCATTCTAGAATAGAAGGTGGTATTGGACCAATGAAG  
GGAGAGTTGAAGTATTTTAAACGCGAGTGGGGAACAGTTTGTGACGACTACTGGGCAACAACGATGCCACAGTTCTTTGTAGAGAAGCTGGGTATCC  
TTTTGGGTGGTTCGATTGTAACCGTGTGCCGATTTCCACCGGGAAACAGGAAATATTCATCTAGATGATCCTAAGTGAATGGAAGAGAACTCATATAA  
GGTATTGCAATCACCGTGGATGGAACGTGCATAACTGTGTCACACAGAAGATGCATTGTTATATGTAACAATACATACGCAATAAGATTGGTAAACGGT  
TCAGGACCACATGAAGGAAGAGTTGAAATGATTACAACAGAAAGTGGGGAACAGTTTGTGATGATAGTTGGGGATCATTAGATGCATCGTTGTTTGTGTA  
GACAGCTTGGATTTTTCATGTTAGGTGCTATTGCTAGAGGAAATGCATATTTTGGGCAAGGAACAGGGAACATTTACTTGTGATGATGTTAAGTGAATGGA  
AGAGAATCAGCTATACGATATTGTAATCATGCTGGATTGAACACACATAACTGTGGACATTATGAAGATGCGTCTGTTACTTGCAGGTTGCATATTCAGTA  
CGATTAGTCCGAGGCTCTGGTCCACATGAAGGAAGAGTTGAAGTATTTTACGACAACGCGTGGGGAACAGTGTGATGATAGTTGGGACTACAAAGAT  
GCTTCGCTGTTTGTAGAGAAGTTGGATTTCCGGGAAGTCTGTGGCTAGACCTTCTGCTTATTTTGGACGGGAAATGAAATATTTACTTGATTATGTT  
GACTGTAAATGACAGAACTCTTTTAAAGCTTGAAGCAAAATGGATGGGGAAGCAACGATAAAGTGAATCCTAATGAAAGACGATCAGTAACATGCAAGCTT  
TTCATACTCAATAAGATTAGTAAATGGTTCAGGACCACATGAAGGAAGACTTGAAGTACTTTATAAATCGTTGGGGAACAGTTTGTGATGATGGTTGGG  
ACTCCGCTGATGCGTCAGTGGTCTGTAGAGAGCTTGGATTTTCTGAGAGGTTGCTATTGGAAGACAATATGCACATTTTGGACAAGGCGCTGGGAGTATC  
ATTCTGATGACGTTAAGTGAATGGAAGTGAAGTCACTTTAAAGTCTTGAATCACCGCAATGGACCGAGCATAACTGTGGACACAGAGAAGATGCATC  
AGTTACCTGTGGATTTACATACGCAATACGATTAGTTGGAGGTTCCGGACACATGAAGGAAGGGTTGAAGTATATATCATAATCGTTGGGGAACAGTT  
TGATGTAATAGTTGGAGCTCAATGATGCGTCAGTTGTTGTAGAGAATCTGGATTTTCTCGGTAGGTTGCCATTGCCAGAACCAGGTTGCTTATTTGGACAA  
GGAAGTGGGAGCATTACTCGATTACGTTAGATGACTGGGAGAGAATCACTTTGAAATATTGTAATCATAATGGATGGATCAGGAATAGCTGTGGACA  
TAGTACTGACGATCGGTTACTTGTGACGACGCGTTCAACAGTGGACCCGATTTGGAACCTGACGTTGAAAGAGTGAAGAAAGTGAAGGAAGATG  
TACAGATTTACTGTGACTTTACGGGACGAAGAGATGATTTGATTTATAGCCGCTGCATGGTTTGTCAATAATTACTGATATACTAGCTCTGCAAGTTGGT

GGTGGCACGAACCTGACTAGTTTCAGACATAGCCTTAGTTAACAGACGATCAACTGAATAGAACAGTGGGCTACGATATCCGCTGTCAGGTTACTAGCCTC  
AGATAGTTTAAACAACACTGATCCAACAGTTCTTACAGTTTCATAGGCATTAAGATATTGACCCAGTAATTCGAGTCAGGGAAGGAGAACATGGGTAA  
TAAGAATAAAAGCGGATGCTGAAGTAGGATGCTATAATATTCGCTGGGTTGATAGATGTCGTATCAACATTAATACCGGATAGTGACCTTGTGATGC  
GACGGCTACGTTAACTAATTGTTGGTGTCAACATTTAGAAATATTGCCAGTGGATGGGATCAAAGATATGAAATCAATATAACAGCTGGTATCAGTA  
ACCAATATGGACAATCATCAAGAGAGTTTGAACCTTTGGGGAATTTGGATCAGCTATGACCATTGGACATGGGCGAAATATACCATTTTCCCCCGC  
TTCAGGTTATTGTTGAGAAAGATAACAACAGTACTCAGTCATTGGTATGTTGAGCAACTAGTATCCGAGGCTTGTGACTTTTAAAGGCCTGAGAATTAACA  
TTCAGAGATTGGAACATTTTCACTGTATAAAGACAGAGAACATGATATTGAGGTTCAAATCAAACCTTCTATGTAGCGTCTTATTGGACATTGTAATT  
GTGGAATGGTGGCAAGGATTGGCGGAACAGCTTATATGATAAGTGCTTGAATCCAACCTGGATAATAGAATATGTTTTGTGTGACTGCTGTAGAT  
ATTTGAGAGTACAGCATAACAATCGAATTTTATGAGCTTACTTGCCTACTGGTGAACAGTGAAGCTGAATTAATAAACGCAAAATCCCAATATGTT  
GACGTCTCGTCACTCCTTCTGTATTAGATAACAATAGTACAGTGGTGTATGTTGGCCGAATATCTTCAAACATAACTGAACAATGTTCTTGAATAATGGC  
AGTACAAGCTCCGATAGAATAAACTACAATCCGAATAGAGGATTTCAATCAGCTTCAAGAATTTGTCAAACCTGTTGGGGGTTCAAAGAAATCAAATTTGTT  
CGACCAAGCGGTTCTGGATGCTGTTACCGAATACAGCAGTAACTATAACATGTCGTTGTAATAAAGCAACGCTAATGATGTTTCAAGTACCTTGTCTG  
TGATGCAGACAGTCCAGTTAAATATGTAAGTAACCCAAATATCACCCCTTTCAAAGAACGTTCCAGTGCCTCACCTTCCGTAGAAGACGAAG  
ATCTGTTCCAGCTGCTTACATTGATGAGGCACCTAGGCGAATCAAAGGCAAGCAGTCTGGACGGGAAATGGACAGAAGAACGGCGACTGTGTT  
TGCACAGGTTATTAACCTGCACTCTATAATTGAATTTTGAAGAGGGAAGTTAAACTGTGGATATAGACCTTGCCTAGAAACCTGTATAGCAGACATT  
AACTTACCAGTACAACAATCTTCCGAAAGTCTCCAGTCTCCAGTGCACAGCTCCAATGCGTAGGAGAAGCGTACTTGGACCCCATGTTACAAGTGAAGA  
AGCAATAAAACACTCAGTCTGAGACAAGTTGAACACTGGACTGCCGAACAATGTTGAGAACAAGGAACTGTAATAATGGAACGTGTGTGTGTTACA  
GATGATATCCGATAGCGGTTGAATTTGATCTTCTGATGAGCTTACTGCTGAAGAATTTGATTTTGAAGGGCTTGTGATTAAGAAGTCAAATGATG  
GATGATATTGGTATTATTGGCGTTCTTTTATACAAACAAGACTCAACATGTCGAATTAACCCCTTACCAACTAGCAGCAATGGAACCTACAACCTTACT  
TGGAACAGTTGTCAACGATGCATCGATCGAAAGCGTGGGGAAGTTATTTGTAATTAACATATTACTAGTTATAGACAGAGGAGATCTGCTGGACAT  
ATCTCAGACACCATCCATCCAAGACACGTTTACAGCTTACTATTTTCAATGATGGTCAACATTACAGCAATGCTCTATCAGTTGTGATTTTGG  
ACTCAGATGTATGACTGTGACGTTGACGGGTTGTCATTAATTTGTCAGTTTTTCGCAAAACCTGCGTGTACAAACCGATGCTACAACAATTCGAA  
AATTATCCCTTGAATGAACAATATATCTGTAGAGCTGATAGTAAATGGCAATAGATGGGAGATTGATCCAGTAAAGCTACCGACCCATGTTACATTTATCAG  
CCATTTACCAATCTTCTCAAGACTAACCAAGTACCAGTTGGACCAACCGTTATAAACGACCGCTATCTATCAGAGGGTTGGTATGGAGAACCTGGAAA  
AGTATTGCAAAATGCAAGCTCTCCAAAGGCGTTGCGGAAGTATACCTATATATCTCAGACTGCACCCTAAAGTGTGAATGTAATCAATC  
TATCAGCTTGTGAAGAAGATATTCTGCTCTATGATAGAGTCCATTGCCATAAGGTCAAACTGTAGAAACGATTTCTTTGATATAAAGTTGAATAGT  
TCACCTTGGAGTCATCTGGATATTGCTAGAGTAACCGACAAGGCAACGTTACTACTACAAGAACAACAAGAGAATGCATGCTATGAACTGATGATC  
CCTTTATATTTTCAATTTTCAATTTAAGTTCATATTATAGCCAATTATAGCAAAATCTATTTTGTGATGATGCTTGTCTGCTAGATATTTTACAATGTGTT  
TATAGAAATTTTGTCTAACAATAATGTCTAAGATATATTAAGATAACGCTTTCTTTGATCCTTAATTACGCATAATAATGTGTAGGTTATAATATAATTTG  
GCATGGGTTTATAAATCTTATAAAAATATTTTCTAGTATTTGTTATTTTGTCTTTAAATTTCTTATTAACCTGATTGATTATTTTGTATTTTCCATTACAA  
AAAGGTGTCGTAGTATTTGCTATATGTTATTTTCACTTCAATTTACTTATAAAATAGTAGATTAGTTAGTAGATGTTATTTTAAAGTTAACCTACTAGTAC  
ATGTTTTTATTATTTTGCATTCATCCCTGTGAACCTAGCTTTCTTTAAATGCATTTTGGGGTTTAGATGTTGTTGGGTTTTTTTGTTTTTTTTCTTGG  
GGGGGGGG

>Unigene11944\_L1\_2\_1

AAAGCTTTTGCAGTTTGTCTGTTGTTGTTTACAACCATGCAGCTGAAGGCTTTGATTGTAACCAATGGACGAAATCTATAGTCGAGATCAACCA  
TCTTGGACAGCAGACTATGAAGCTTGTGCTGAGATTCGAAAGGAAAACCCCAACGATCACATCTGTGAGTACCATCAGACCTTGTATGCCAACACTGAA  
CGGAATTTGGTTATAGAGAAGCTAGAGAAGTTGTAAGATTGGTCCACTTTTGGTTTCGATGCTACAATAATCAGCAACCTGACGGCCACTGTTAGATT  
ACAAAGTTCGATTCTGTTGATGCAACAGACACCAACATGTAAAAAATGGACCCAGTTTACAACAGAGATGCTCCATCTGCTTCTGGTATTGGGAAACT  
TGAATGATCTACGTAAGCCCAACCTCCTCTGTGCAAAACCTTCCGCTTATGATGTCAGATTGGTTAAAACGAAAGGATTTAGAAGCGCTAATGAG  
GTTAAGTGTGATTTCCATCCAGAGTTTGGTGGCAAGATAAGCTGCAAGATAAACTGCGAAAATTAACAAGTACTGCGAAAATTAACAAGTCCGATTTCTGTTGCTCAATC  
TCTCCATCTGTTATCTCTTATTAATATGTAACCTAATTTGTTAGTGTGATCCGAAAACATGTAAAAAAATCTTTATTTTCTCAAAAAGAACTTCTACTAT  
CATTTGTAAGTCCCTTTTGAACAAGTACGGCCAGTAGATGATGAACACTTATTATTAGTATCAATATGTAACAACAATCTTTTATCTTCCGAAATAAA  
CCTCTGAT

>Cl1231.Contig2\_L1\_2\_1

TTTTATTTCTTAAATTAATGTTGGTATATAAATTTAGCATTCTTCCACTCTCTAACACTTTAATAAAACACCATTTTTCATAGAAGTCTGCTATACACCACCA  
CAGTAGTTAGAGACGCATGTGGCATTGGATGAGATGGACATCTTGCAAACCTACATGGATCTATGAAACAGTTCCACCACTGCACGCTTTAGGACATTG  
TCTACACCAGACATGTTGGACAATTTCTTCAATTTCTGCTCATCTGACACTTTATCAACTGCAACAGCACAAGGTACTAGGGCACTAGGTTTGGTGTG  
GGTTTGAACACCTGTTGGGTTGTTGACTCTATAAACCACAACCTTGTGCAACAATTTCTGTGTAAGGACAATCTCTGCTGTTACTGCAATTCGTAAT  
TATAACATGGAACTTGGCAGCAACAATCCGGGCGAGAAACCTTCTTACGATTGACAATTCGGAATTTCTGGGATATTTACAACCTTGGCCACATCCATT  
CCTACAACAATCTGACCGTCTGACACTCACGATCGCTAAGCAGTTGAACCTAGGATCAAAGAGACAGATCGTTGTTAAACCACTTGGTTTTGGACAAC  
GTGGGTTATCTGAGATCTCACACATACAAAAAACAACGCAAAATAGTAAATACTTCAATATGTCACAACATGCAGTTAAAGTTACACAAAAACATGGACT  
ATACAACCTACTGTTATATATACAACCTGTTAGGACCAATCCGATTGCTAGTTTCACTGATCCGCTTAAATGACAATGGGCTTGCATTTGCTATTGACA  
CCAACATTTGGCTAATTCATCCGACGTAATTTCTGTCATTTTGAATTTTGAATTTTGAATTTAGTGGGCTGTAATAATGTTAGGGACTTAAGGTAATAAACA  
AAACATAATGTATCCGCTTAAAAAT

>CL5339.Contig3\_L1\_2\_1

ATGGATTTAAGGCGGCGGAGTTTAACTGGCAACATAAATCACAGATCATCGCTCAGTATATAATGATTATAAAATGACAACCTACAGATACATTGTTGATT  
TTTCTGTTTTATCAAGTCAAGTTTGTCTATATTGCTGCCATCAATGTTGCTATTAATAAACCACACGACAGAGTACGATTAATCTTGGTGTCAACTCTC  
AAGTTGGGCTGGCTAACAGCGTGGTGGTGTATAGATTACTACAGGAGTTTCATATCAACACCGTTAGAATATTGGAGAGAGCTCATGGTGAAGACAT  
GAACTGAGTGTGGATTTGAGATGAGAATAAGTTCTAGTGGTCAAGTGTGATAAAGCAGGGTTTACAGCAGCTACACCATGTTTTAAAGATAGCGCATCAA  
CAACAGATTGATACATACTGAGAGATGCAATCATCCAACAATACCATCATTATCCGCTAGATATATTTTATATCTGTTAAACGCACTGATGCAAGATT  
GGATATCTGTGAGTTCAAGTATTTGAGATGACTGTCCGATGTTTCTATGGTAGCAACTGTAACATACGATGCCACATCTGCTCTGCAACAACATCTG  
TGATAAGATGAGGAGTCTGTTTCTCACGGTTGTTATGGTACTACTATGCTGTAACCACTGCAAGTCTACTTGTAGTACGATTAAGTGAATGTTAAATGTTG  
ATGACATGACAGGCGATGTTTTGGATGTAAGATGGTTACTATGGTAAAGAATGCCAGTCTACTTGTAGTAGCCATTGTACTGATGGTAAATGTGATGAC  
ATGACAGGCGATGTTTTGGATGTAAGATGGTTACTATGGTAAAGAATGCCAGTCTACTTGTAGTAGCCATTGTACTGATGGTAAATGTGATGACATGAC  
AGGGCGATGTTTTGGATGTAAGATGGTTACTATGGTAAAGAATGCCAGTCTACTTGTAGTAGCCATTGTAAAGGATGGTAAATGTGATGACAGGACAGGA  
CGATGTTTTGGATGTGAAGCTGGTTACTATGTTGATGTTGTGCGAAGTCTGTTTCACTGTAATGGTCTATGTCGACAATTAGATGGCGTTTGTGACT  
GGTTGTAAGATGGTTATTGGGGATGCAATGGGTTGTGCTACAGACATGTTCTACTGCTCTACAGGAGGCTGTAGGATAGAAGTGGCGTATGTTTTAA  
CGATGTAAGATGGTCTGAACAACACTAAATGTAACCAGGATCGAGTACGGGACTACTCCAGACTACATGCAGTTCCAGATGCGATGCAAGAA  
CTATCTCTGCTGTCTAATGTTAACTATAAATGTTAAAGGGGCTTATCTACAGGGCTACCACAGGCTCATTGCTTCCATCTGGTGAATGGGATTT  
CAATTTTACATGTAATAATGCCAGGACATGTGATGAAGCTCATCAACTGGGAGTACCAGTTACACCTACTAGTCTGTTAGCCGGATATCAAAACAACA





CCTTCTTCTTGACCTTCTTGTCTTCTTCGTCTGTTGCGAATTAACACTTACATCATTTTGTTCGCGCCATCATCTTCATTAAGTGAATCCAATATATCATTAG  
CTACATCATTCTCCATTAACCTTCTTGTCTTGTATCTTCTTGTCTTCATCTTGTCTTCTTCTTCTGTTGCGAATTAACACTTATATCATCTTGTTCCTCG  
CCACCATCTTCATTAAGTGAATCCAATATATCATTAGCTACATCATTCTCCATTAACCTTCTTGTCTTGTATCTTCTTGTCTTGCCTTGTCTTCTTCTC  
TGTTGCGAATTAACACTTATATCATCTTGTCTCGCCACCATCTTCATTAAGTGAATCCAATAAATCATTAGCTACTTCATTCTCCATTACCTTCTTCTGT  
TCTTGCCCGTTTGTTCATCATCTTCGCCTTGTCTTCTTCTTCTGTTGCGAATTAACACTTACATCATCTTGTCTCGCCACCATCTTCATTAAGTGAATCCA  
ATAAATCATTAGCTACTTCATTCTCCATTACCTTCTTGTCTTGTTCGCGTTTGTTCATCATCTTCGCCTTGTCTTCTTCTGTTGCGAATTAACACTT  
ACATCATTTTGTTCGCGCCATCATCTTCATTAAGTGAATCCAATATATCATTAGCTACATCATTCTCCATTAACCTTCTTGTCTTGTATCTTCTTGTCTT  
CTTCTTGACCTTCTTGTCTTCTTCGTCTGTTGCGAATTAACACTTACATCATCTTGTCTCGCCACCATCTTCATTAAGTGAATCCAATAAATCATTAGCTA  
CTTCATTCTCCATTACCTTCTTGTCTTGTTCGCGTTTGTTCATCATCTTCGCCTTGTCTTCTTCTTC
